# Supplementary material for: Immunoglobulin superfamily member 10 is a novel prognostic biomarker for breast cancer
Source: PeerJ journal article supplement (doi:10.7717/peerj.10128), 2020-10-21
Supplement: MCF7_cell-line_authenticity_certification.pdf [file MCF7_cell-line_authenticity_certification.pdf]

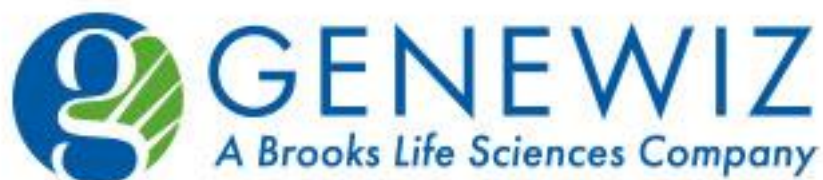

# Cell Line Authentication Report

## GENEWIZ

C3 Building, 218 Xinghu Road  
Suzhou Industrial Park, 215123

Suzhou, China

Tel: 400-8100-669

[www.genewiz.com](http://www.genewiz.com)

[www.genewiz.com.cn](http://www.genewiz.com.cn)

## Cell Line Authentication Report

Customer: Weiyan.Peng

Quotation Number: 80-393307609

Completion Date: 12/06/2019

### 1. Sample ID: MCF7

### 2. Original Material: Cell pellets

### 3. Methods:

- 1). Genomic DNA was extracted from the cell pellets provided by the customer.
- 2). Samples, together with positive and negative control were amplified using GenePrint 10 System (Promega).
- 3). Amplified products were processed using the ABI3730xl Genetic Analyzer.
- 4). Data were analyzed using GeneMapper4.0 software and then compared with the ATCC, DSMZ, JCRB and

RIKEN etc. databases for reference matching.

### 4. Results:

#### 1) 10 Loci STR Profile:

| Genetic Site<br>(Locus)                                            | Cell Bank<br>information |    | Customer sample |    |
|--------------------------------------------------------------------|--------------------------|----|-----------------|----|
|                                                                    | MCF7                     |    | MCF7            |    |
| Amelogenin                                                         | X                        | X  | X               | X  |
| CSF1PO                                                             | 10                       | 10 | 10              | 10 |
| D13S317                                                            | 11                       | 11 | 11              | 11 |
| D16S539                                                            | 11                       | 12 | 11              | 12 |
| D5S818                                                             | 11                       | 12 | 11              | 12 |
| D7S820                                                             | 8                        | 9  | 8               | 9  |
| TH01                                                               | 6                        | 6  | 6               | 6  |
| TPOX                                                               | 9                        | 12 | 9               | 12 |
| vWA                                                                | 14                       | 15 | 14              | 15 |
| D21S11                                                             |                          |    | 30              | 30 |
| Percent match between the sample and the database profile:<br>100% |                          |    |                 |    |

### Summary:

Your cell line is considered to be “identical” to the reference cell line in the Cell Bank STR database, as the STR profile yields a 100% match.

Notes:

1.  $P=100\% \times (2 \times M)/N$ ;  $M=18$ ,  $N=36$ ,  $P=100\% \times (2 \times 18)/36=100\%$

M: number of the matching peaks; N: number of all peaks

2. Based on the ANSI Standard, cell lines with  $\geq 80\%$  match are considered to be related; i.e., derived from a common ancestry. Cell lines with between a 55% to 80% match require further profiling for authentication of relatedness.

3. The short tandem repeat (STR) profile generated by GENEWIZ is indicative only of the sample sent to GENEWIZ at the time it was sent. This data and analysis are for research use only.

GENEWIZ

## 2) Electrophoretogram

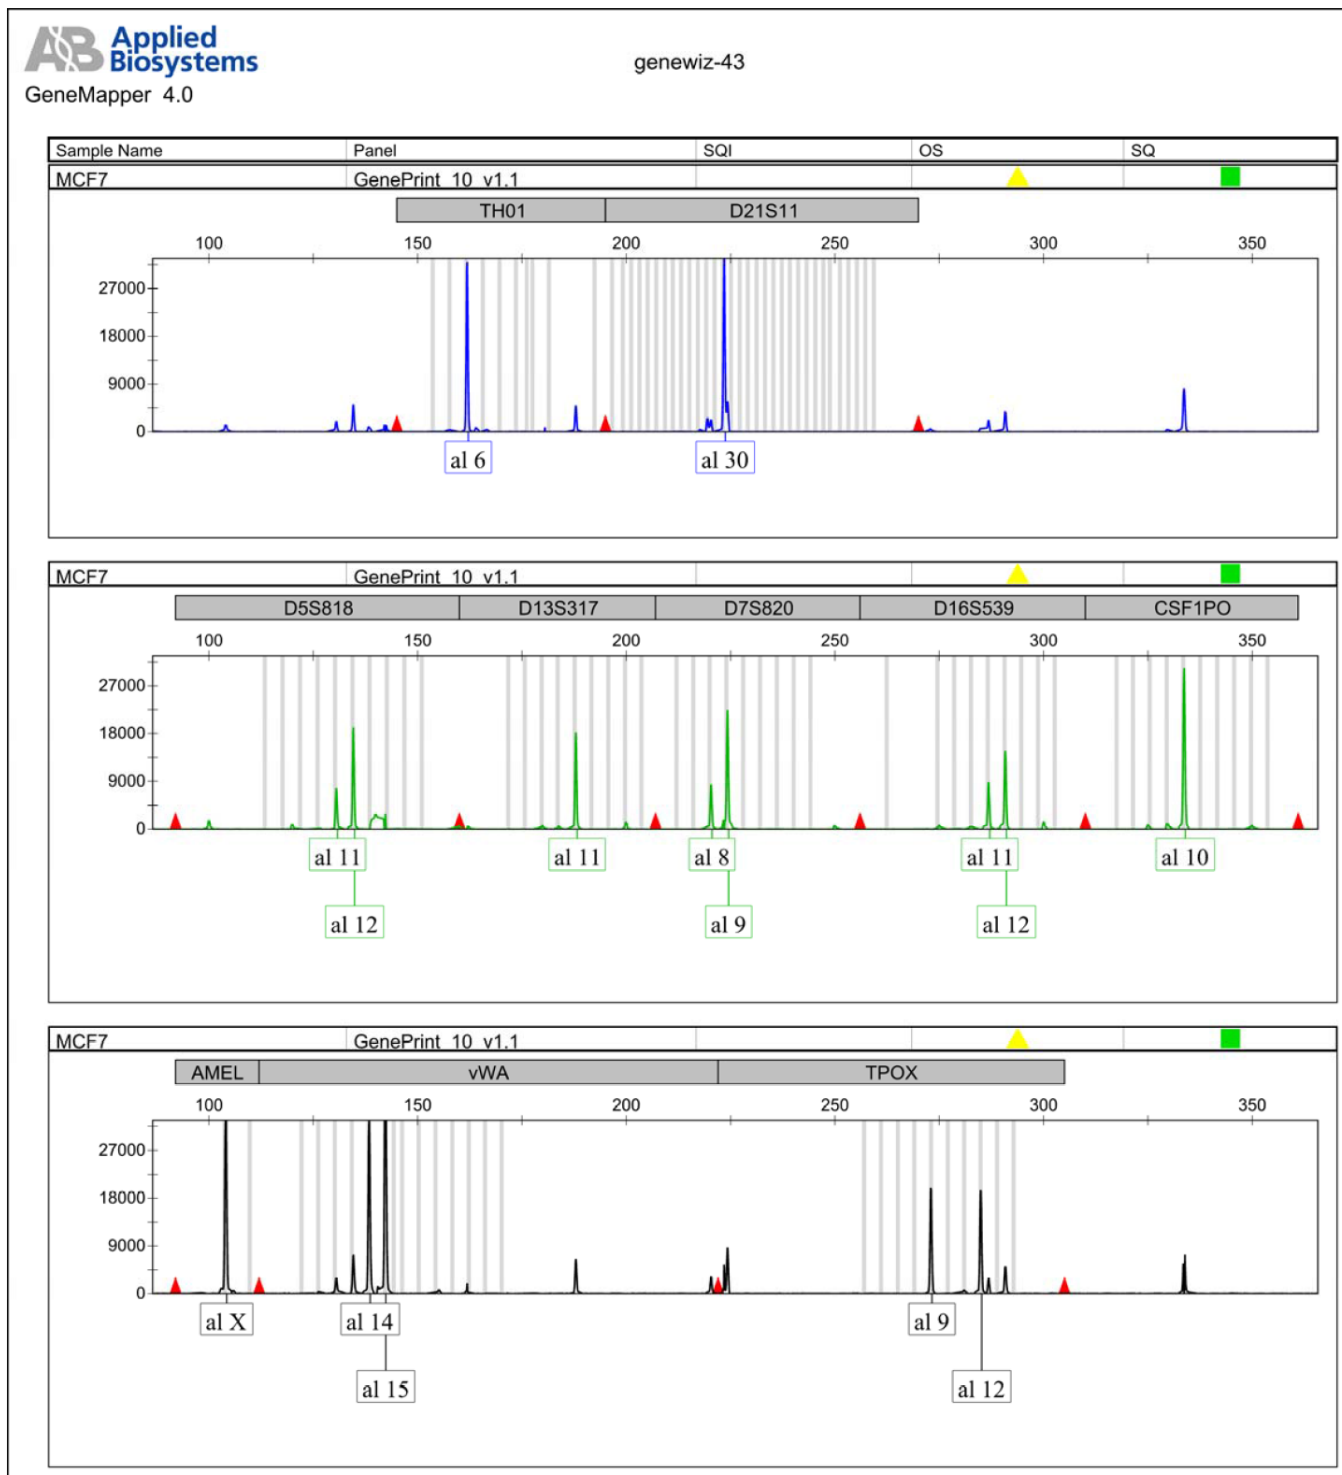

Note: Raw data in appendix
