# Supplementary material for: Immunoglobulin superfamily member 10 is a novel prognostic biomarker for breast cancer
Source: PeerJ journal article supplement (doi:10.7717/peerj.10128), 2020-10-21
Supplement: MCF10A_cell-line_authenticity_certification.pdf [file MCF10A_cell-line_authenticity_certification.pdf]

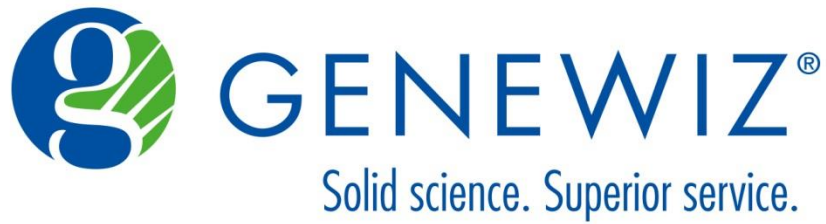

# Cell Line Authentication Report

**GENEWIZ, Inc. Suzhou**

C3 Building, 218 Xinghu Road,

Suzhou Industrial Park, 215123,

Suzhou, China

Fax: 010-59458058

Email: [Genomics.China@genewiz.com.cn](mailto:Genomics.China@genewiz.com.cn)

[www.genewiz.com.cn](http://www.genewiz.com.cn)

## Cell Line Authentication Report

Customer: PengWeiYan

Institution: The First Affiliated Hospital of Chongqing Medical University

Quotation Number: 80-65747945

Completion Date: 07/10/2017

### 1. Sample ID: MCF10A

### 2. Original Material: Cell pellets

### 3. Methods:

1). Genomic DNA was extracted from the cell pellets provided by the customer.

2). Samples, together with positive and negative control were amplified using GenePrint 10 System (Promega).

3). Amplified products were processed using the ABI3730xl Genetic Analyzer.

4). Data were analyzed using GeneMapper4.0 software and then compared with the ATCC, DSMZ or JCRB databases for reference matching.

### 4. Results:

#### 1) 10 Loci STR Profile:

| Genetic Site<br>(Locus) | Customer sample |     |
|-------------------------|-----------------|-----|
| Amelogenin              | X               |     |
| CSF1PO                  | 10              | 12  |
| D13S317                 | 8               | 9   |
| D16S539                 | 11              | 12  |
| D5S818                  | 10              | 13  |
| D7S820                  | 10              | 11  |
| TH01                    | 8               | 9.3 |
| TPOX                    | 9               | 11  |
| vWA                     | 15              | 17  |
| D21S11                  | 28              | 30  |

<<<If the Percent match is not 100%, search for reference matching with the ATCC, DSMZ or JCRB databases and add the match results.

Addendum: Comparative output from the ATCC STR Profile database

**Result of STR matching analysis by your data.**  
- DSMZ Profile Database -

A graphical presentation is shown at the bottom of this page.

| EV           | Cell No.  | Cell name                | Locus names   |             |               |               |               |                |             |              | Figures       |        |
|--------------|-----------|--------------------------|---------------|-------------|---------------|---------------|---------------|----------------|-------------|--------------|---------------|--------|
|              |           |                          | D5S818        | D13S317     | D7S820        | D16S539       | VWA           | TH01           | AM          | TPOX         |               | CSF1PO |
|              |           | <i>Query (Your Cell)</i> | <i>10, 13</i> | <i>8, 9</i> | <i>10, 11</i> | <i>11, 12</i> | <i>15, 17</i> | <i>8, 9, 3</i> | <i>X, X</i> | <i>9, 11</i> | <i>10, 12</i> |        |
| 1.00 (36/36) | CRL-10317 | MCF 10A                  | 10, 13        | 8, 9        | 10, 11        | 11, 12        | 15, 17        | 8, 9, 3        | X, X        | 9, 11        | 10, 12        | -      |
| 1.00 (36/36) | CRL-10318 | MCF 10F                  | 10, 13        | 8, 9        | 10, 11        | 11, 12        | 15, 17        | 8, 9, 3        | X, X        | 9, 11        | 10, 12        | -      |

>>>

2) Electrophoretogram

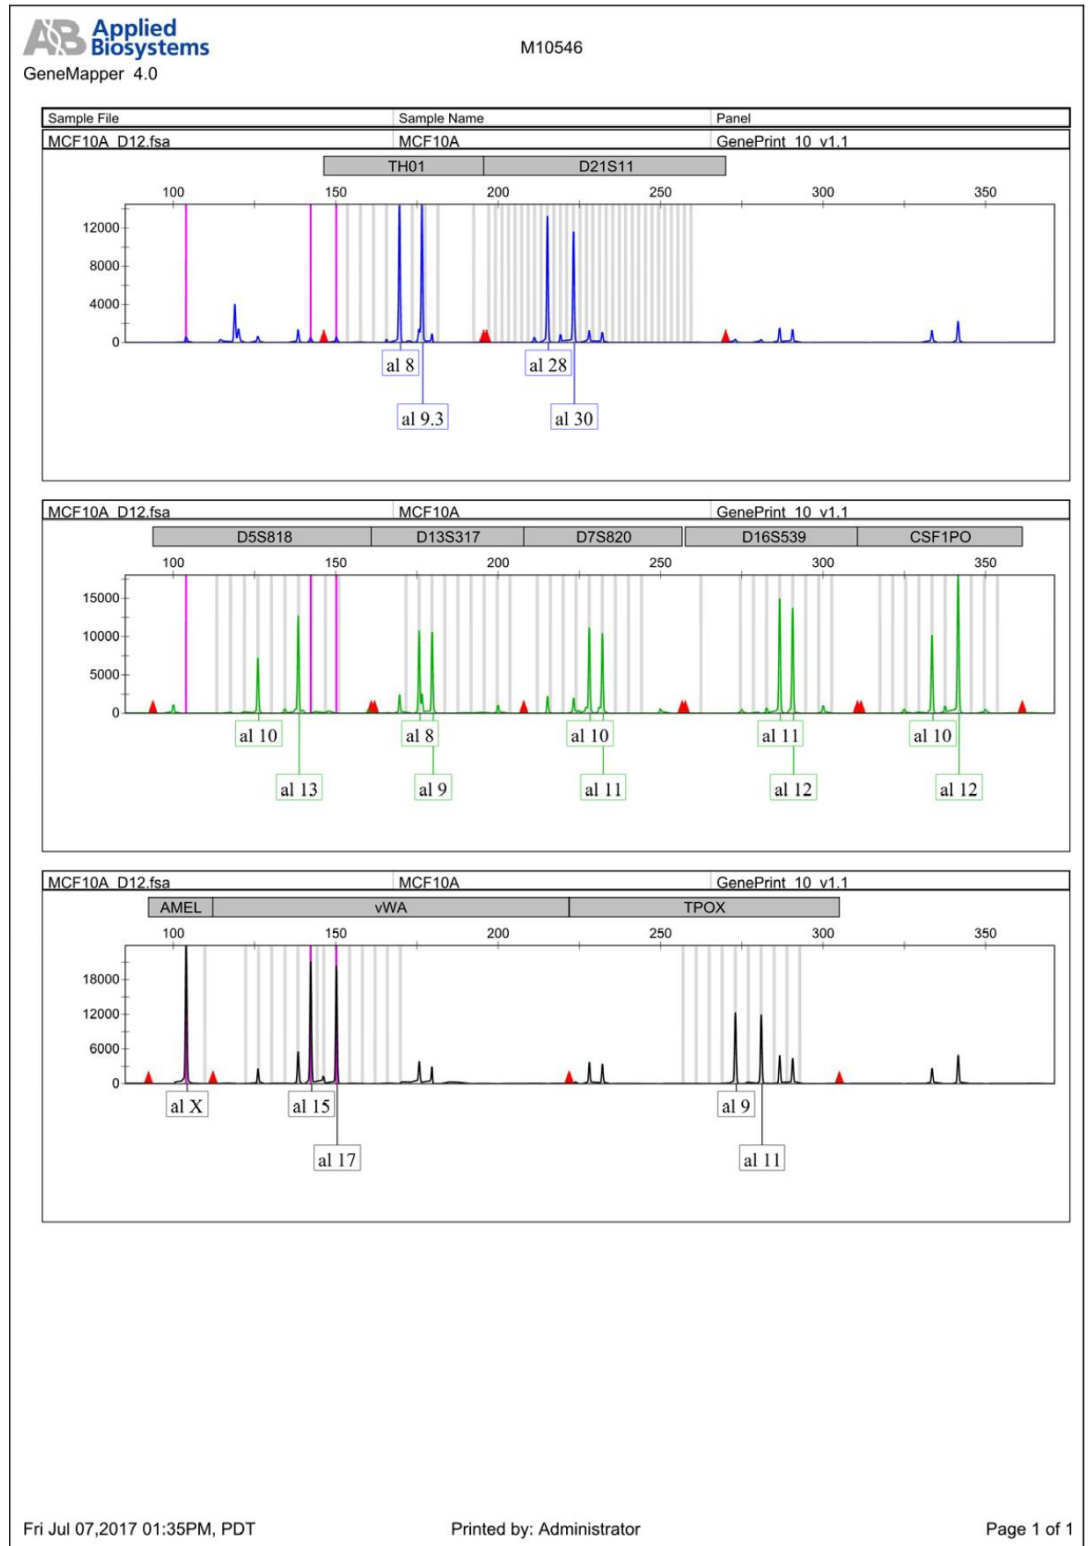

Note: Raw data in appendix
