# Supplementary material for: Immunoglobulin superfamily member 10 is a novel prognostic biomarker for breast cancer
Source: PeerJ. 2020 Oct 21;8:e10128. doi: 10.7717/peerj.10128 (PMC7585383; doi:10.7717/peerj.10128)
Supplement: Supplemental Information 2 — Average Ct values in breast cancer and adjacent normal tissues obtained using qPCR. [file peerj-08-10128-s002.xlsx]

## Sheet: Sheet1
N114	T114	N77	T77	N73	T73	N29	T29	N30	T30
24.1855	26.8025	27.3921	28.4801	27.0059	29.4102	28.201	29.5834	26.2322	29.6063
25.0261	28.0761	27.3274	28.3311	26.8554	28.8846	28.5598	29.7712	27.3855	29.42
24.1582	NA	27.1441	29.1703	26.9966	29.1872	29.4573	28.9091	26.5007	29.9363
17.9503	18.1002	20.3868	19.4775	22.3299	20.2889	17.1873	NA	20.7061	19.3164
17.1313	18.5504	20.1901	19.3207	23.2289	19.0896	17.0795	15.0795	19.5483	19.1963
17.1958	17.9278	21.1659	19.2032	23.2338	19.4879	NA	16.1747	19.7061	20.9553
N151	T151	N148	T148	N114	T114	N78	T78	N73	T73
27.075	27.7613	25.2519	29.9912	24.1855	28.8025	27.3921	28.4801	27.0059	NA
27.1409	27.6254	24.3963	28.8589	25.0261	28.0761	27.3274	28.3311	26.8554	28.8846
27.1472	27.8382	24.8862	28.8374	24.1582	NA	27.1441	29.1703	26.9966	29.1872
20.7805	19.4467	20.8184	20.7977	18.9503	20.1002	20.3868	19.4775	20.9299	20.2889
19.4013	19.4265	20.532	20.7841	18.7313	19.5504	21.1901	19.3207	20.2289	19.0896
18.2712	19.7105	20.1032	19.1747	19.0958	19.9278	20.1659	19.2032	19.2338	19.4879
N24	T24	N31	T31	N27	T27	N150	T150	N152	T152
27.0595	32.5159	25.7431	29.3147	26.574	29.3394	30.4245	30.0734	27.8131	30.1346
27.585	33.117	26.062	29.939	26.884	29.5468	31.3001	29.9342	27.3397	29.579
27.4544	32.6577	NA	30.1637	26.6288	30.0951	31.0513	30.7013	NA	29.6906
22.0277	22.5096	20.0817	17.1783	20.1902	20.1781	24.0221	24.7861	21.0517	20.0657
22.6816	22.3508	20.0989	17.5017	20.0327	20.2106	24.1255	25.4326	21.002	19.8601
23.1433	22.3772	20.1448	17.235	20.1381	20.3335	24.3959	25.7275	NA	20.0583
N23	T23	N25	T25	N21	T21	N31	T31	N44	T44
29.1136	28.9319	33.7586	29.7666	27.0595	32.5159	25.7431	29.3147	30.4245	30.0734
29.2028	28.6253	34.2366	28.926	27.585	33.117	26.062	29.939	31.3001	29.9342
29.0454	29.4429	NA	29.1032	27.4544	32.6577	25.7013	30.1637	31.0513	30.7013
19.322	24.3104	20.602	20.0982	22.0277	NA	20.0817	17.1783	24.7861	24.0221
19.403	24.2901	20.7754	20.2533	22.6816	22.3508	20.0989	17.5017	25.4326	24.1255
19.3681	24.5284	21.0632	20.7884	23.1433	22.3772	20.1448	17.235	25.7275	24.3959
N138	T138
28.1231	28.0306
28.124	28.8409
29.7448	29.8521
19.1864	24.0662
19.4843	NA
19.1487	24.0761
