# Supplementary material for: Immunoglobulin superfamily member 10 is a novel prognostic biomarker for breast cancer
Source: PeerJ. 2020 Oct 21;8:e10128. doi: 10.7717/peerj.10128 (PMC7585383; doi:10.7717/peerj.10128)
Supplement: Supplemental Information 3 — Average Ct values in breast cell lines obtained using qPCR. [file peerj-08-10128-s003.xlsx]

## Sheet: Sheet1
CELL LINE	IGSF10	GAPDH
MCF10A	26.1858	17.2002	0.00217465
MCF10A	25.9737	17.4755	0.00237971
MCF10A	26.0722	17.1522	0.00222035
BT549	31.6837	16.8761	3.16595e-05
BT549	31.8522	16.5922	2.81404e-05
BT549	31.1755	16.7286	4.47734e-05
MB231	25.7356	15.0022	0.000576657
MB231	25.8785	15.0356	0.000512557
MB231	25.815	14.8098	0.000534323
MCF7	25.6531	16.2061	0.00139067
MCF7	25.8817	16.1358	0.00118574
MCF7	25.5704	16.1421	0.00146997
SKBR3	27.5022	14.9802	0.000149248
SKBR3	27.6841	15.0094	0.000166753
SKBR3	27.5221	14.9204	0.000166753
T47D	29.5735	16.115	7.92077e-05
T47D	29.4755	15.6731	8.48927e-05
T47D	29.6108	16.0501	7.70418e-05
ZR75	27.5917	15.6631	0.000237465
ZR75	27.4651	15.5274	0.000258061
ZR75	27.617	15.4562	0.000232578
