# Supplementary material for: Immunoglobulin superfamily member 10 is a novel prognostic biomarker for breast cancer
Source: PeerJ. 2020 Oct 21;8:e10128. doi: 10.7717/peerj.10128 (PMC7585383; doi:10.7717/peerj.10128)
Supplement: Supplemental Information 4 [file peerj-08-10128-s004.xlsx]

## Sheet: Sheet1
sampleID	gene expression	Age_at_Initial_Pathologic_Diagnosis_nature2012	Gender_nature2012	HER2_Final_Status_nature2012	Node_nature2012	Tumor_nature2012	_OS	breast_carcinoma_estrogen_receptor_status	breast_carcinoma_progesterone_receptor_status	pathologic_stage
TCGA-A1-A0SB-01	9.3072	70	FEMALE	Negative	N0	T1	259	Positive	Negative	Stage I
TCGA-A1-A0SD-01	7.5361	59	FEMALE	Negative	N0	T2	437	Positive	Positive	Stage IIA
TCGA-A1-A0SE-01	7.2854	56	FEMALE	Negative	N0	T1	1321	Positive	Positive	Stage I
TCGA-A1-A0SF-01	7.8196	54	FEMALE	Negative	N0	T2	1463	Positive	Positive	Stage IIA
TCGA-A1-A0SG-01	6.3384	61	FEMALE	Negative	N1	T2	434	Positive	Positive	Stage IIB
TCGA-A1-A0SH-01	7.9586	39	FEMALE	Negative	N0	T2	1437	Negative	Positive	Stage IIA
TCGA-A1-A0SI-01	7.503	52	FEMALE	Negative	N1	T2	635	Positive	Positive	Stage IIB
TCGA-A1-A0SJ-01	7.3716	39	FEMALE	Negative	N1	T3	416	Positive	Positive	Stage IIIA
TCGA-A1-A0SK-01	6.6064	54	FEMALE	Negative	N0	T2	967	Negative	Negative	Stage IIA
TCGA-A1-A0SN-01	6.7175	50	FEMALE	Positive	N1	T1	1196	Positive	Positive	Stage IIA
TCGA-A1-A0SO-01	3.6582	67	FEMALE	Negative	N1	T2	852	Negative	Negative	Stage IIB
TCGA-A1-A0SP-01	7.9392	40	FEMALE	Negative	N0	T2	584	Negative	Negative	Stage IIA
TCGA-A1-A0SQ-01	6.0521	45	FEMALE	Negative	N1	T2	554	Positive	Positive	Stage IIB
TCGA-A2-A04N-01	6.4293	66	FEMALE	Negative	N0	T1	3188	Positive	Positive	Stage IA
TCGA-A2-A04P-01	4.7789	36	FEMALE	Negative	N3	T2	548	Negative	Negative	Stage IIIC
TCGA-A2-A04Q-01	6.9319	48	FEMALE	Negative	N0	T1	2385	Negative	Negative	Stage IA
TCGA-A2-A04R-01	5.9924	36	FEMALE	Negative	N0	T1	2499	Positive	Positive	Stage IA
TCGA-A2-A04T-01	7.0792	62	FEMALE	Negative	N0	T2	2246	Negative	Negative	Stage IIA
TCGA-A2-A04U-01	6.7058	47	FEMALE	Negative	N0	T2	1486	Negative	Negative	Stage IIA
TCGA-A2-A04V-01	4.2109	39	FEMALE	Negative	N0	T2	1920	Positive	Positive	Stage IIA
TCGA-A2-A04W-01	6.8043	50	FEMALE	Positive	N1	T2	1948	Negative	Negative	Stage IIB
TCGA-A2-A04X-01	3.4716	34	FEMALE	Positive	N0	T2	1686	Positive	Positive	Stage IIA
TCGA-A2-A04Y-01	6.155	53	FEMALE	Negative	N1	T2	1099	Positive	Positive	Stage IIB
TCGA-A2-A0CL-01	8.0473	37	FEMALE	Negative	N2	T3	1964	Positive	Positive	Stage IIIA
TCGA-A2-A0CM-01	4.1387	40	FEMALE	Negative	N0	T2	754	Negative	Negative	Stage IIA
TCGA-A2-A0CP-01	7.9482	60	FEMALE	Negative	N0	T1	2813	Positive	Positive	Stage IA
TCGA-A2-A0CQ-01	3.7555	62	FEMALE	Negative	N0	T1	2695	Positive	Positive	Stage IA
TCGA-A2-A0CS-01	3.936	73	FEMALE	Negative	N3	T4	2298	Positive	Positive	Stage IV
TCGA-A2-A0CT-01	5.287	71	FEMALE	Negative	N0	T2	2289	Positive	Negative	Stage IIA
TCGA-A2-A0CU-01	4.926	73	FEMALE	Negative	N0	T2	158	Positive	Positive	Stage IIA
TCGA-A2-A0CV-01	7.1611	41	FEMALE	Negative	N1	T2	1930	Positive	Positive	Stage IIB
TCGA-A2-A0CW-01	4.2119	67	FEMALE	Negative	N1	T2	1948	Positive	Positive	Stage IIB
TCGA-A2-A0CX-01	5.9148	52	FEMALE	Positive	N0	T2	1728	Positive	Negative	Stage IIA
TCGA-A2-A0CY-01	4.1354	63	FEMALE	Negative	N1	T2	1673	Positive	Positive	Stage IIB
TCGA-A2-A0CZ-01	8.0067	46	FEMALE	Negative	N0	T2	1616	Positive	Positive	Stage IIA
TCGA-A2-A0D0-01	3.7832	60	FEMALE	Negative	N0	T2	643	Negative	Negative	Stage IIA
TCGA-A2-A0D1-01	4.2753	76	FEMALE	Positive	N0	T2	1051	Negative	Negative	Stage IIA
TCGA-A2-A0D2-01	4.602	45	FEMALE	Negative	N0	T2	1027	Negative	Negative	Stage IIA
TCGA-A2-A0D3-01	4.5188	42	FEMALE	Negative	N0	T1	875	Positive	Positive	Stage IA
TCGA-A2-A0D4-01	5.1216	37	FEMALE	Negative	N1	T2	767	Positive	Positive	Stage IIB
TCGA-A2-A0EM-01	6.4711	73	FEMALE	Negative	N0	T1	3094	Positive	Positive	Stage IA
TCGA-A2-A0EN-01	7.396	70	FEMALE	Negative	N0	T2	2718	Positive	Positive	Stage IIA
TCGA-A2-A0EO-01	6.0109	54	FEMALE	Negative	N0	T1	2442	Positive	Positive	Stage IA
TCGA-A2-A0EQ-01	6.1253	64	FEMALE	Positive	N0	T2	2426	Negative	Negative	Stage IIA
TCGA-A2-A0ER-01	6.0789	63	FEMALE	Negative	N1	T1	2263	Positive	Positive	Stage IB
TCGA-A2-A0ES-01	8.0546	52	FEMALE	Negative	N0	T2	1127	Positive	Positive	Stage IIA
TCGA-A2-A0ET-01	4.2793	58	FEMALE	Negative	N2	T2	1066	Positive	Positive	Stage IIIA
TCGA-A2-A0EU-01	5.7614	79	FEMALE	Negative	N0	T1	1043	Positive	Positive	Stage IA
TCGA-A2-A0EV-01	6.0192	80	FEMALE	Negative	N0	T1	968	Positive	Positive	Stage IA
TCGA-A2-A0EW-01	8.4124	53	FEMALE	Negative	N3	T1	905	Positive	Positive	Stage IIIC
TCGA-A2-A0EX-01	6.4687	46	FEMALE	Negative	N0	T3	752	Positive	Positive	Stage IIB
TCGA-A2-A0EY-01	5.2323	62	FEMALE	Positive	N1	T2	735	Positive	Negative	Stage IIB
TCGA-A2-A0ST-01	7.3422	62	FEMALE	Negative	N1	T1	3017	Negative	Negative	Stage IIA
TCGA-A2-A0SU-01	5.5432	66	FEMALE	Negative	N0	T2	1662	Positive	Positive	Stage IIA
TCGA-A2-A0SV-01	3.476	63	FEMALE	Negative	N2	T2	825	Positive	Positive	Stage IV
TCGA-A2-A0SW-01	4.9464	82	FEMALE	Negative	N2	T2	1365	Positive	Negative	Stage IV
TCGA-A2-A0SX-01	6.7237	48	FEMALE	Negative	N0	T1	1534	Negative	Negative	Stage IA
TCGA-A2-A0SY-01	6.495	62	FEMALE	Positive	N1	T3	1347	Positive	Positive	Stage IIIA
TCGA-A2-A0T0-01	3.1479	59	FEMALE	Negative	N1	T2	533	Negative	Negative	Stage IIB
TCGA-A2-A0T1-01	5.3863	55	FEMALE	Positive	N3	T3	521	Negative	Negative	Stage IIIC
TCGA-A2-A0T2-01	4.4854	66	FEMALE	Negative	N3	T3	255	Negative	Negative	Stage IV
TCGA-A2-A0T3-01	5.3795	37	FEMALE	Negative	N1	T1	569	Positive	Positive	Stage IB
TCGA-A2-A0T4-01	7.2599	62	FEMALE	Negative	N0	T2	624	Positive	Positive	Stage IIA
TCGA-A2-A0T5-01	5.0486	39	FEMALE	Negative	N0	T2	531	Positive	Positive	Stage IIA
TCGA-A2-A0T6-01	6.5139	50	FEMALE	Negative	N0	T3	575	Positive	Positive	Stage IIB
TCGA-A2-A0T7-01	7.8111	51	FEMALE	Negative	N0	T2	631	Positive	Positive	Stage IIA
TCGA-A2-A0YC-01	6.7969	59	FEMALE	Negative	N1	T2	990	Positive	Positive	Stage IIB
TCGA-A2-A0YD-01	7.4586	63	FEMALE	Negative	N0	T3	769	Positive	Positive	Stage IIB
TCGA-A2-A0YE-01	8.4028	48	FEMALE	Negative	N1	T2	554	Negative	Negative	Stage IIB
TCGA-A2-A0YG-01	5.4373	63	FEMALE	Positive	N3	T2	666	Positive	Positive	Stage IIIC
TCGA-A2-A0YH-01	5.7979	53	FEMALE	Negative	N2	T2	659	Positive	Positive	Stage IIIA
TCGA-A2-A0YI-01	6.4107	62	FEMALE	Negative	N0	T1	1505	Positive	Positive	Stage I
TCGA-A2-A0YJ-01	3.5831	39	FEMALE	Negative	N2	T3	566	Positive	Negative	Stage IIIA
TCGA-A2-A0YK-01	8.9705	61	FEMALE	Negative	N0	T2	588	Positive	Negative	Stage IIA
TCGA-A2-A0YL-01	8.0652	48	FEMALE	Negative	N2	T3	1474	Positive	Positive	Stage IIIA
TCGA-A2-A0YM-01	8.7942	67	FEMALE	Negative	N0	T2	965	Negative	Negative	Stage IIA
TCGA-A2-A0YT-01	6.0325	56	FEMALE	Negative	N2	T4	723	Positive	Negative	Stage IIIB
TCGA-A2-A1FV-01	7.0161	74	FEMALE	Negative	N0	T3	714	Positive	Positive	Stage IIB
TCGA-A2-A1FW-01	7.1611	62	FEMALE	Negative	N2	T3	528	Positive	Negative	Stage IIIA
TCGA-A2-A1FX-01	6.7653	61	FEMALE	Negative	N2	T3	1119	Positive	Positive	Stage IIIA
TCGA-A2-A1FZ-01	7.4112	63	FEMALE	Negative	N0	T2	683	Positive	Positive	Stage IIA
TCGA-A2-A1G0-01	8.6142	49	FEMALE	Negative	N1	T2	616	Positive	Positive	Stage IIB
TCGA-A2-A1G1-01	5.5433	85	FEMALE	Positive	N1	T2	584	Negative	Negative	Stage IIB
TCGA-A2-A1G4-01	3.707	71	FEMALE	Negative	N1	T3	595	Positive	Positive	Stage IIIA
TCGA-A2-A1G6-01	8.9754	50	FEMALE	Negative	N2	T2	501	Negative	Negative	Stage IIIA
TCGA-A2-A259-01	7.1233	70	FEMALE	Negative	N0	T1	1596	Positive	Positive	Stage IA
TCGA-A2-A25A-01	9.4077	44	FEMALE	Negative	N0	T2	3276	Positive	Positive	Stage IIA
TCGA-A2-A25B-01	4.8534	39	FEMALE	Negative	N1	T2	496	Positive	Positive	Stage IIB
TCGA-A2-A25C-01	6.2138	50	FEMALE	Negative	N1	T2	523	Positive	Positive	Stage IIB
TCGA-A2-A25D-01	6.4056	90	FEMALE	Negative	N3	T2	552	Positive	Negative	Stage IIIC
TCGA-A2-A25F-01	7.9719	66	FEMALE	Negative	N0	T2	322	Negative	Positive	Stage IIA
TCGA-A7-A0CD-01	4.3361	66	FEMALE	Negative	N0	T1	1165	Positive	Positive	Stage I
TCGA-A7-A0CE-01	4.5044	57	FEMALE	Negative	N0	T2	1074	Negative	Negative	Stage IIA
TCGA-A7-A0CG-01	8.2441	78	FEMALE	Negative	N0	T2	1043	Positive	Negative	Stage IIA
TCGA-A7-A0CJ-01	5.3173	57	FEMALE	Negative	N0	T2	931	Positive	Positive	Stage IIA
TCGA-A7-A0D9-01	5.9811	37	FEMALE	Negative	N0	T2	1139	Positive	Negative	Stage IIA
TCGA-A7-A0DA-01	5.5906	62	FEMALE	Negative	N0	T2	1085	Negative	Negative	Stage IIA
TCGA-A7-A0DB-01	6.5504	56	FEMALE	Negative	N0	T2	1007	Positive	Positive	Stage IIA
TCGA-A7-A0DC-01	3.1598	63	FEMALE	Negative	N0	T1	906	Positive	Negative	Stage IA
TCGA-A7-A13D-01	7.3602	46	FEMALE	Negative	N0	T2	965	Negative	Positive	Stage IIA
TCGA-A7-A13E-01	3.188	62	FEMALE	Negative	N1	T2	614	Positive	Negative	Stage IIB
TCGA-A7-A13F-01	7.7805	44	FEMALE	Negative	N1	T3	765	Positive	Positive	Stage IIIA
TCGA-A7-A13G-01	6.0111	79	FEMALE	Negative	N0	T2	718	Positive	Positive	Stage IIA
TCGA-A7-A26E-01	7.9826	71	FEMALE	Negative	N1	T3	954	Positive	Positive	Stage IIIA
TCGA-A7-A26F-01	7.7253	55	FEMALE	Negative	N0	T1	738	Negative	Negative	Stage IA
TCGA-A7-A26G-01	7.7098	50	FEMALE	Negative	N0	T2	722	Negative	Negative	Stage IIA
TCGA-A7-A26H-01	6.8467	72	FEMALE	Positive	N1	T1	724	Positive	Negative	Stage IIA
TCGA-A7-A26I-01	6.3873	65	FEMALE	Negative	N0	T2	661	Negative	Negative	Stage IIA
TCGA-A7-A26J-01	7.5451	49	FEMALE	Negative	N0	T2	627	Positive	Positive	Stage IIA
TCGA-A8-A06N-01	0.9395	66	FEMALE	Negative	N0	T4		Positive	Negative	Stage IIIB
TCGA-A8-A06O-01	5.5617	60	FEMALE	Negative	N0	T1	396	Positive	Positive	Stage I
TCGA-A8-A06P-01	5.9264	63	FEMALE	Negative	N2	T1	396	Positive	Positive	Stage IIIA
TCGA-A8-A06Q-01	2.7627	63	FEMALE	Negative	N2	T3	31	Positive	Positive	Stage IIIA
TCGA-A8-A06T-01	4.0197	75	FEMALE	Negative	N1	T3	1614	Positive	Positive	Stage IIIA
TCGA-A8-A06X-01	3.3135	77	FEMALE	Positive	N0	T3	943	Positive	Negative	Stage IIB
TCGA-A8-A06Y-01	3.0072	66	FEMALE	Negative	N0	T2	791	Positive	Positive	Stage IIA
TCGA-A8-A06Z-01	2.2629	84	FEMALE	Negative	N0	T3	31	Positive	Positive	Stage IIB
TCGA-A8-A075-01	4.0053	42	FEMALE	Negative	N1	T2	518	Positive	Positive	Stage IIB
TCGA-A8-A076-01	4.4746	66	FEMALE	Positive	N0	T2	1642	Positive	Positive	Stage IIA
TCGA-A8-A079-01	4.6076	69	FEMALE	Negative	N3	T4	274	Positive	Positive	Stage IIIB
TCGA-A8-A07B-01	4.6732	69	FEMALE	Positive	N0	T2	1308	Positive	Positive	Stage IIA
TCGA-A8-A07C-01	6.6352	57	FEMALE	Negative	N0	T2	1034	Negative	Negative	Stage IIA
TCGA-A8-A07F-01	7.0031	65	FEMALE	Negative	N1	T2	577	Positive	Positive	Stage IIB
TCGA-A8-A07G-01	6.0423	65	FEMALE	Negative	N1	T1	577	Positive	Positive	Stage IIA
TCGA-A8-A07I-01	6.1066	69	FEMALE	Positive	N2	T2	426	Positive	Negative	Stage IIIA
TCGA-A8-A07J-01	6.8864	35	FEMALE	Negative	N1	T2	365	Positive	Positive	Stage IIB
TCGA-A8-A07L-01	4.3838	58	FEMALE	Negative	N1	T3	975	Positive	Positive	Stage IIIA
TCGA-A8-A07O-01	5.5377	51	FEMALE	Negative	N0	T2	304	Negative	Negative	Stage IIA
TCGA-A8-A07P-01	4.594	68	FEMALE	Positive	N1	T2	334	Positive	Positive	Stage IIB
TCGA-A8-A07S-01	5.2021	73	FEMALE	Negative	N0	T2	243	Positive	Negative	Stage IIA
TCGA-A8-A07U-01	7.309	66	FEMALE	Negative	N2	T2	760	Negative	Positive	Stage IIIA
TCGA-A8-A07W-01	5.4352	76	FEMALE	Negative	N0	T2	304	Positive	Positive	Stage IV
TCGA-A8-A07Z-01	3.2992	85	FEMALE	Negative	N0	T2	1371	Positive	Positive	Stage IIA
TCGA-A8-A081-01	2.8564	80	FEMALE	Negative	N0	T2		Positive	Positive	Stage IIA
TCGA-A8-A082-01	3.1699	58	FEMALE	Negative	N1	T2		Positive	Positive	Stage IIB
TCGA-A8-A083-01	2.213	67	FEMALE	Negative	N0	T3		Positive	Positive	Stage IIB
TCGA-A8-A084-01	4.5263	81	FEMALE	Negative	N1	T2	458	Positive	Negative	Stage IIB
TCGA-A8-A086-01	7.1041	59	FEMALE	Negative	N1	T1	396	Positive	Positive	Stage IIA
TCGA-A8-A08A-01	3.4288	89	FEMALE	Negative	N0	T1	30	Positive	Positive	Stage I
TCGA-A8-A08B-01	1.868	52	FEMALE	Positive	N0	T2	1156	Positive	Negative	Stage IIA
TCGA-A8-A08C-01	4.2946	65	FEMALE	Negative	N0	T2	881	Positive	Positive	Stage IIA
TCGA-A8-A08F-01	3.5911	59	FEMALE	Negative	N3	T2	1004	Positive	Positive	Stage IIIC
TCGA-A8-A08G-01	4.5449	41	FEMALE	Positive	N0	T2	607	Positive	Positive	Stage IIA
TCGA-A8-A08H-01	8.1217	66	FEMALE	Positive	N0	T2		Positive	Positive	Stage IIA
TCGA-A8-A08I-01	4.9335	53	FEMALE	Negative	N0	T2	365	Positive	Positive	Stage IIA
TCGA-A8-A08J-01	4.3665	52	FEMALE	Negative	N3	T4	1127	Positive	Negative	Stage IV
TCGA-A8-A08L-01	3.1067	89	FEMALE	Negative	N2	T3	304	Positive	Negative	Stage IIIA
TCGA-A8-A08O-01	6.5139	45	FEMALE	Negative	N3	T2	943	Positive	Positive	Stage IV
TCGA-A8-A08P-01	5.3507	70	FEMALE	Positive	N2	T2	943	Positive	Positive	Stage IIIA
TCGA-A8-A08R-01	5.9229	52	FEMALE	Negative	N1	T2	30	Negative	Negative	Stage IIB
TCGA-A8-A08S-01	3.5811	71	FEMALE	Positive	N1	T1	1004	Positive	Positive	Stage IIA
TCGA-A8-A08T-01	4.5002	64	FEMALE	Negative	N1	T2	3409	Positive	Positive	Stage IV
TCGA-A8-A08X-01	4.9273	43	FEMALE	Positive	N3	T4	1308	Negative	Negative	Stage IIIC
TCGA-A8-A08Z-01	6.0785	76	FEMALE	Negative	N3	T4	1217	Positive	Positive	Stage IIIB
TCGA-A8-A090-01	4.6922	74	FEMALE	Negative	N0	T2		Positive	Positive	Stage IIA
TCGA-A8-A091-01	6.1698	61	FEMALE	Negative	N0	T2	1004	Positive	Negative	Stage IIA
TCGA-A8-A092-01	4.103	48	FEMALE	Negative	N2	T2	942	Positive	Positive	Stage IIIA
TCGA-A8-A093-01	6.2591	61	FEMALE	Negative	N0	T2	546	Positive	Positive	Stage IIA
TCGA-A8-A094-01	4.9239	75	FEMALE	Negative	N0	T2		Positive	Negative	Stage IIA
TCGA-A8-A095-01	6.6587	45	FEMALE	Negative	N0	T1	1277	Positive	Positive	Stage I
TCGA-A8-A096-01	5.3097	73	FEMALE	Negative	N0	T2		Positive	Positive	Stage IIA
TCGA-A8-A097-01	7.4254	65	FEMALE	Positive	N1	T2	365	Positive	Positive	Stage IIB
TCGA-A8-A09B-01	5.031	58	FEMALE	Negative	N1	T4	365	Positive	Positive	Stage IIIB
TCGA-A8-A09D-01	5.7952	47	FEMALE	Negative	N1	T2	1522	Positive	Positive	Stage IIB
TCGA-A8-A09G-01	7.3426	79	FEMALE	Positive	N3	T3		Positive	Negative	Stage IIIC
TCGA-A8-A09I-01	5.1716	84	FEMALE	Positive	N0	T2	1371	Positive	Positive	Stage IIA
TCGA-A8-A09K-01	5.0096	68	FEMALE	Negative	N1	T1	912	Positive	Positive	Stage IIA
TCGA-A8-A09M-01	2.4915	75	FEMALE	Negative	N3	T2	1006	Positive	Positive	Stage IIIC
TCGA-A8-A09N-01	6.2491	57	FEMALE	Positive	N3	T2	31	Positive	Positive	Stage IIIC
TCGA-A8-A09Q-01	5.3658	83	FEMALE	Negative	N2	T4	761	Positive	Positive	Stage IIIB
TCGA-A8-A09R-01	5.4273	82	FEMALE	Negative	N1	T2	273	Positive	Positive	Stage IIB
TCGA-A8-A09V-01	6.5828	51	FEMALE	Negative	N0	T2	457	Positive	Positive	Stage IIA
TCGA-A8-A09W-01	4.9436	70	FEMALE	Negative	N3	T2	30	Positive	Positive	Stage IIIB
TCGA-A8-A09X-01	4.1341	62	FEMALE	Negative	N3	T2	426	Negative	Negative	Stage IIIC
TCGA-A8-A09Z-01	1.0501	83	FEMALE	Negative	N0	T3		Positive	Negative	Stage IIB
TCGA-A8-A0A1-01	6.0932	84	FEMALE	Negative	N0	T2	365	Positive	Positive	Stage IIA
TCGA-A8-A0A2-01	6.4837	66	FEMALE	Negative	N0	T2	579	Positive	Positive	Stage IIA
TCGA-A8-A0A4-01	6.0973	73	FEMALE	Negative	N0	T2	396	Positive	Positive	Stage IIA
TCGA-A8-A0A6-01	7.0888	64	FEMALE	Negative	N3	T2	640	Positive	Positive	Stage IIIC
TCGA-A8-A0A7-01	6.179	57	FEMALE	Positive	N1	T2	30	Negative	Negative	Stage IIB
TCGA-A8-A0A9-01	5.2774	80	FEMALE	Negative	N0	T2	822	Positive	Positive	Stage IIA
TCGA-A8-A0AB-01	5.9801	54	FEMALE	Negative	N0	T2	518	Positive	Positive	Stage IIA
TCGA-A8-A0AD-01	3.7225	83	FEMALE	Negative	N0	T1	1157	Positive	Positive	Stage I
TCGA-AC-A23C-01	7.072	62	FEMALE	Positive	N1	T2	29	Positive	Positive	Stage IIB
TCGA-AC-A23E-01	6.8986	50	FEMALE	Negative	N1	T2	72	Positive	Positive	Stage IIB
TCGA-AC-A23H-01	3.7546	90	FEMALE	Positive	N0	T2	174	Positive	Negative	Stage IIA
TCGA-AN-A03X-01	6.127	74	FEMALE	Negative	N0	T2	10	Positive	Positive	Stage IIA
TCGA-AN-A03Y-01	3.363	66	FEMALE	Negative	N0	T2	10	Positive	Positive	Stage IIA
TCGA-AN-A046-01	5.148	68	FEMALE	Negative	N0	T2	10	Positive	Positive	Stage IIA
TCGA-AN-A049-01	6.6154	62	FEMALE	Negative	N0	T2	19	Positive	Positive	Stage IIA
TCGA-AN-A04A-01	6.5833	36	FEMALE	Negative	N2	T2	90	Positive	Positive	Stage IIIA
TCGA-AN-A04C-01	3.3535	51	FEMALE	Positive	N1	T2	54	Negative	Negative	Stage IIB
TCGA-AN-A04D-01	2.9838	58	FEMALE	Negative	N1	T2	52	Negative	Negative	Stage IIB
TCGA-AN-A0AJ-01	4.7398	79	FEMALE	Positive	N0	T3	303	Positive	Positive	Stage IIB
TCGA-AN-A0AK-01	3.1662	76	FEMALE	Negative	N0	T2	224	Positive	Negative	Stage IIA
TCGA-AN-A0AL-01	5.2028	41	FEMALE	Negative	N0	T4	198	Negative	Negative	Stage IIIB
TCGA-AN-A0AM-01	3.5618	56	FEMALE	Negative	N0	T2	5	Positive	Negative	Stage IIA
TCGA-AN-A0AR-01	1.958	55	FEMALE	Negative	N0	T2	10	Negative	Negative	Stage IIA
TCGA-AN-A0AS-01	4.8091	70	FEMALE	Negative	N2	T2	10	Positive	Negative	Stage IIIA
TCGA-AN-A0AT-01	4.8123	62	FEMALE	Negative	N0	T2	10	Negative	Negative	Stage IIA
TCGA-AN-A0FD-01	6.4127	71	FEMALE	Positive	N0	T2	196	Positive	Positive	Stage IIA
TCGA-AN-A0FF-01	5.1084	32	FEMALE	Negative	N0	T1	172	Positive	Positive	Stage IA
TCGA-AN-A0FJ-01	9.498	59	FEMALE	Negative	N2	T2	242	Positive	Negative	Stage IV
TCGA-AN-A0FK-01	2.7187	88	FEMALE	Negative	N0	T4	213	Positive	Positive	Stage IIIB
TCGA-AN-A0FL-01	4.4415	62	FEMALE	Negative	N0	T2	231	Negative	Negative	Stage IIA
TCGA-AN-A0FN-01	6.5134	61	FEMALE	Negative	N0	T1	218	Positive	Positive	Stage IB
TCGA-AN-A0FS-01	8.4594	55	FEMALE	Negative	N0	T1	191	Positive	Negative	Stage IB
TCGA-AN-A0FT-01	3.2807	63	FEMALE	Positive	N1	T2	214	Positive	Positive	Stage IIB
TCGA-AN-A0FV-01	6.1863	58	FEMALE	Positive	N0	T2	10	Negative	Negative	Stage IIA
TCGA-AN-A0FX-01	6.2472	52	FEMALE	Negative	N0	T2	10	Negative	Negative	Stage IIA
TCGA-AN-A0FY-01	4.345	55	FEMALE	Negative	N0	T1	10	Positive	Positive	Stage IB
TCGA-AN-A0G0-01	4.8648	56	FEMALE	Negative	N0	T2	16	Negative	Negative	Stage IIA
TCGA-AN-A0XL-01	7.3055	61	FEMALE	Negative	N0	T2	10	Positive	Positive	Stage IIA
TCGA-AN-A0XN-01	8.0553	68	FEMALE	Negative	N2	T2	10	Negative	Positive	Stage IIIA
TCGA-AN-A0XO-01	5.8112	59	FEMALE	Negative	N2	T2	375	Positive	Negative	Stage IIIA
TCGA-AN-A0XP-01	4.094	69	FEMALE	Negative	N2	T2	9	Positive	Positive	Stage IIIA
TCGA-AN-A0XR-01	2.9287	55	FEMALE	Negative	N2	T2	10	Positive	Negative	Stage IIIA
TCGA-AN-A0XS-01	5.3764	63	FEMALE	Negative	N2	T2	10	Negative	Positive	Stage IIIA
TCGA-AN-A0XT-01	4.224	54	FEMALE	Negative	N2	T2	10	Positive	Negative	Stage IIIA
TCGA-AN-A0XU-01	7.0662	54	FEMALE	Negative	N0	T2	10	Negative	Negative	Stage IIA
TCGA-AN-A0XV-01	7.5671	67	FEMALE	Negative	N2	T2	162	Positive	Positive	Stage IIIA
TCGA-AN-A0XW-01	6.0437	36	FEMALE	Negative	N2	T2	170	Positive	Positive	Stage IIIA
TCGA-AO-A03L-01	6.647	34	FEMALE	Negative	N2	T3	2442	Positive	Positive	Stage IIIA
TCGA-AO-A03M-01	6.28	29	FEMALE	Negative	N0	T1	1866	Positive	Positive	Stage I
TCGA-AO-A03N-01	3.8094	59	FEMALE	Negative	N1	T2	2031	Positive	Positive	Stage IIB
TCGA-AO-A03O-01	4.9399	69	FEMALE	Negative	N0	T2	2483	Positive	Positive	Stage IIA
TCGA-AO-A03P-01	3.8097	54	FEMALE	Negative	N1	T2	2911	Positive	Positive	Stage IIB
TCGA-AO-A03R-01	4.7922	57	FEMALE	Negative	N1	T2	2091	Positive	Positive	Stage IIB
TCGA-AO-A03T-01	5.669	42	FEMALE	Negative	N1	T2	1456	Positive	Positive	Stage IIB
TCGA-AO-A03U-01	6.8044	31	FEMALE	Negative	N0	T1	1793	Negative	Negative	Stage I
TCGA-AO-A03V-01	5.9026	41	FEMALE	Negative	N0	T1	886	Positive	Positive	Stage I
TCGA-AO-A0J2-01	3.5984	41	FEMALE	Negative	N0	T1	997	Negative	Negative	Stage IA
TCGA-AO-A0J3-01	2.0807	67	FEMALE	Negative	N1	T2	651	Positive	Positive	Stage IIB
TCGA-AO-A0J4-01	6.8796	41	FEMALE	Negative	N0	T1	1587	Negative	Negative	Stage IA
TCGA-AO-A0J5-01	8.1773	48	FEMALE	Negative	N1	T4	792	Positive	Negative	Stage IV
TCGA-AO-A0J6-01	4.3508	61	FEMALE	Negative	N0	T2	1140	Negative	Negative	Stage IIA
TCGA-AO-A0J7-01	5.0067	71	FEMALE	Negative	N1	T2	618	Positive	Positive	Stage IIB
TCGA-AO-A0J8-01	6.0086	61	FEMALE	Negative	N0	T2	680	Positive	Positive	Stage IIA
TCGA-AO-A0J9-01	6.4067	61	FEMALE	Negative	N3	T2	1613	Positive	Positive	Stage IIIC
TCGA-AO-A0JA-01	8.1612	36	FEMALE	Negative	N3	T2	655	Positive	Positive	Stage IIIC
TCGA-AO-A0JB-01	5.0208	50	FEMALE	Negative	N1	T3	1542	Positive	Positive	Stage IIIA
TCGA-AO-A0JC-01	7.6038	64	FEMALE	Negative	N0	T2	1547	Positive	Positive	Stage IIA
TCGA-AO-A0JD-01	4.5592	59	FEMALE	Negative	N1	T3	2190	Positive	Positive	Stage IIIA
TCGA-AO-A0JE-01	7.2355	53	FEMALE	Positive	N2	T2	2335	Negative	Negative	Stage IIIA
TCGA-AO-A0JF-01	7.6582	68	FEMALE	Negative	N1	T1	650	Positive	Positive	Stage IIA
TCGA-AO-A0JG-01	6.9543	49	FEMALE	Negative	N2	T2	798	Positive	Positive	Stage IIIA
TCGA-AO-A0JI-01	6.6304	56	FEMALE	Negative	N1	T1	1528	Positive	Negative	Stage IIA
TCGA-AO-A0JJ-01	8.3124	54	FEMALE	Negative	N1	T2	1887	Positive	Positive	Stage IIB
TCGA-AO-A0JL-01	2.7009	59	FEMALE	Negative	N2	T2	1683	Negative	Negative	Stage IIIA
TCGA-AO-A0JM-01	5.0738	40	FEMALE	Positive	N1	T2	2184	Positive	Positive	Stage IIB
TCGA-AO-A124-01	10.2736	38	FEMALE	Negative	N0	T2	3120	Negative	Negative	Stage IIA
TCGA-AO-A125-01	1.0944	72	FEMALE	Negative	N0	T2	3019	Positive	Positive	Stage IIA
TCGA-AO-A126-01	4.5301	39	FEMALE	Negative	N0	T2	3307	Positive	Positive	Stage IIA
TCGA-AO-A128-01	5.3822	61	FEMALE	Negative	N0	T2	3248	Negative	Negative	Stage IIA
TCGA-AO-A129-01	6.6191	29	FEMALE	Negative	N1	T2	2923	Negative	Negative	Stage IIB
TCGA-AO-A12A-01	6.9875	47	FEMALE	Negative	N0	T2	2755	Positive	Positive	Stage IIA
TCGA-AO-A12B-01	0.5088	63	FEMALE	Negative	N0	T2	2989	Positive	Positive	Stage IIA
TCGA-AO-A12C-01	9.128	42	FEMALE	Positive	N1	T2	1994	Positive	Positive	Stage IIB
TCGA-AO-A12D-01	5.7122	43	FEMALE	Positive	N1	T1	1948	Negative	Negative	Stage IIA
TCGA-AO-A12E-01	7.8504	51	FEMALE	Negative	N0	T3	1743	Positive	Positive	Stage IIB
TCGA-AO-A12F-01	6.1097	36	FEMALE	Negative	N0	T2	1471	Negative	Negative	Stage IIA
TCGA-AO-A12G-01	5.6264	75	FEMALE	Negative	N0	T2	1266	Positive	Positive	Stage IIA
TCGA-AO-A12H-01	2.101	69	FEMALE	Negative	N0	T2	863	Positive	Positive	Stage IIA
TCGA-AO-A1KO-01	9.6883	46	FEMALE	Negative	N0	T3	448	Positive	Positive	Stage IIB
TCGA-AO-A1KP-01	5.1758	77	FEMALE	Negative	N1	T1	2513	Positive	Positive	Stage IIA
TCGA-AO-A1KS-01	6.4635	69	FEMALE	Negative	N0	T2	16	Positive	Positive	Stage IIA
TCGA-AO-A1KT-01	6.0497	78	FEMALE	Negative	N1	T1	541	Positive	Positive	Stage IIA
TCGA-AQ-A04H-01	4.6828	61	FEMALE	Positive	N2	T2	754	Positive	Positive	Stage IIIA
TCGA-AQ-A04J-01	7.623	45	FEMALE	Negative	N0	T2	819	Negative	Negative	Stage IIA
TCGA-AQ-A04L-01	5.5639	48	FEMALE	Positive	N0	T2	3957	Positive	Negative	Stage IIA
TCGA-AQ-A0Y5-01	7.3676	70	FEMALE	Positive	N2	T2	172	Positive	Positive	Stage IIIA
TCGA-AQ-A1H2-01	3.3621	84	FEMALE	Positive	N2	T2	475	Positive	Positive	Stage IIIA
TCGA-AQ-A1H3-01	7.5785	49	FEMALE	Negative	N3	T2	989	Positive	Positive	Stage IIIC
TCGA-AR-A0TP-01	5.474	43	FEMALE	Negative	N0	T2	3386	Positive	Negative	Stage IIA
TCGA-AR-A0TQ-01	6.6953	27	FEMALE	Positive	N1	T3	2240	Positive	Negative	Stage IIIA
TCGA-AR-A0TR-01	6.3628	68	FEMALE	Negative	N1	T2	160	Positive	Positive	Stage IIB
TCGA-AR-A0TS-01	7.0334	46	FEMALE	Negative	N1	T2	2275	Negative	Negative	Stage IIB
TCGA-AR-A0TT-01	4.9435	53	FEMALE	Negative	N2	T2	2636	Positive	Negative	Stage IIIA
TCGA-AR-A0TU-01	1.9326	35	FEMALE	Negative	N0	T2	417	Negative	Negative	Stage IIA
TCGA-AR-A0TV-01	3.8726	66	FEMALE	Negative	N0	T2	1288	Positive	Positive	Stage IIA
TCGA-AR-A0TW-01	4.417	50	FEMALE	Negative	N1	T3	3009	Positive	Positive	Stage IIIA
TCGA-AR-A0TX-01	7.0477	64	FEMALE	Positive	N1	T1	1972	Positive	Positive	Stage IIA
TCGA-AR-A0TY-01	4.9234	54	FEMALE	Negative	N0	T2	1699	Positive	Negative	Stage IIA
TCGA-AR-A0TZ-01	5.1086	43	FEMALE	Negative	N2	T2	3262	Positive	Positive	Stage IIIA
TCGA-AR-A0U0-01	2.9361	73	FEMALE	Negative	N1	T2	1988	Negative	Negative	Stage IIB
TCGA-AR-A0U1-01	5.7893	36	FEMALE	Negative	N1	T2	3101	Negative	Negative	Stage IIB
TCGA-AR-A0U2-01	4.0448	47	FEMALE	Negative	N2	T2	2551	Positive	Positive	Stage IIIA
TCGA-AR-A0U3-01	4.8269	59	FEMALE	Negative	N1	T2	3468	Positive	Positive	Stage IIB
TCGA-AR-A0U4-01	8.2265	54	FEMALE	Negative	N0	T2	2615	Negative	Negative	Stage IIA
TCGA-AR-A1AH-01	3.0667	51	FEMALE	Negative	N1	T2	2298	Positive	Negative	Stage IIB
TCGA-AR-A1AI-01	3.3001	47	FEMALE	Negative	N0	T2	1881	Negative	Negative	Stage IIA
TCGA-AR-A1AJ-01	7.1554	83	FEMALE	Negative	N0	T1	1605	Positive	Negative	Stage I
TCGA-AR-A1AK-01	8.1919	70	FEMALE	Negative	N0	T1	1559	Positive	Positive	Stage I
TCGA-AR-A1AL-01	9.3069	60	FEMALE	Negative	N1	T3	1485	Positive	Positive	Stage IIIA
TCGA-AR-A1AN-01	8.3355	46	FEMALE	Negative	N0	T2	1330	Positive	Positive	Stage IIA
TCGA-AR-A1AO-01	8.4276	47	FEMALE	Negative	N1	T1	1325	Positive	Negative	Stage IIA
TCGA-AR-A1AP-01	5.8943	80	FEMALE	Negative	N0	T1	1216	Positive	Positive	Stage I
TCGA-AR-A1AQ-01	4.437	49	FEMALE	Negative	N0	T2	1310	Negative	Negative	Stage IIA
TCGA-AR-A1AR-01	6.3236	50	FEMALE	Negative	N2	T1	524	Negative	Negative	Stage IIIA
TCGA-AR-A1AS-01	4.3477	54	FEMALE	Negative	N1	T2	1150	Positive	Positive	Stage IIB
TCGA-AR-A1AT-01	5.2406	62	FEMALE	Positive	N0	T2	1272	Positive	Positive	Stage IIA
TCGA-AR-A1AU-01	9.0393	39	FEMALE	Negative	N2	T2	2318	Positive	Positive	Stage IIIA
TCGA-AR-A1AW-01	6.8104	65	FEMALE	Negative	N0	T2	1935	Positive	Positive	Stage IIA
TCGA-AR-A1AX-01	7.5816	64	FEMALE	Positive	N0	T1	1890	Positive	Positive	Stage I
TCGA-AR-A1AY-01	8.2345	65	FEMALE	Negative	N0	T1	1026	Negative	Negative	Stage I
TCGA-AR-A24H-01	4.2804	65	FEMALE	Negative	N0	T2	4776	Positive	Positive	Stage IIA
TCGA-AR-A24K-01	5.3359	46	FEMALE	Negative	N0	T2	1548	Positive	Positive	Stage IIA
TCGA-AR-A24L-01	7.4202	26	FEMALE	Negative	N1	T2	2866	Positive	Positive	Stage IIB
TCGA-AR-A24M-01	7.7214	38	FEMALE	Negative	N2	T2	2947	Positive	Positive	Stage IIIA
TCGA-AR-A24N-01	6.1955	54	FEMALE	Negative	N0	T1	2388	Positive	Positive	Stage I
TCGA-AR-A24O-01	8.6396	43	FEMALE	Negative	N2	T3	2561	Positive	Positive	Stage IIIA
TCGA-AR-A24P-01	7.4692	47	FEMALE	Negative	N0	T1	84	Positive	Positive	Stage I
TCGA-AR-A24Q-01	7.1576	49	FEMALE	Negative	N0	T3	3088	Positive	Negative	Stage IIB
TCGA-AR-A24R-01	6.2871	45	FEMALE	Negative	N2	T1	2653	Positive	Positive	Stage IIIA
TCGA-AR-A24S-01	6.615	61	FEMALE	Negative	N0	T1	2976	Positive	Positive	Stage I
TCGA-AR-A24T-01	9.0158	46	FEMALE	Negative	N3	T3	2312	Positive	Positive	Stage IIIC
TCGA-AR-A24U-01	6.318	47	FEMALE	Positive	N1	T1	1623	Negative	Negative	Stage IIA
TCGA-AR-A24V-01	6.2807	52	FEMALE	Negative	N1	T2	2596	Positive	Positive	Stage IIB
TCGA-AR-A24X-01	5.2969	52	FEMALE	Negative	N0	T2	2548	Positive	Positive	Stage IIA
TCGA-AR-A24Z-01	3.3765	57	FEMALE	Negative	N0	T2	2403	Positive	Positive	Stage IIA
TCGA-AR-A250-01	5.9981	58	FEMALE	Positive	N0	T2	2274	Positive	Negative	Stage IIA
TCGA-AR-A251-01	5.825	51	FEMALE	Negative	N2	T2	2387	Positive	Negative	Stage IIIA
TCGA-AR-A252-01	8.6602	50	FEMALE	Negative	N0	T1	2226	Positive	Positive	Stage I
TCGA-AR-A254-01	6.2804	50	FEMALE	Positive	N2	T2	2213	Positive	Positive	Stage IIIA
TCGA-AR-A255-01	7.1769	62	FEMALE	Positive	N0	T1	1792	Positive	Positive	Stage I
TCGA-AR-A256-01	8.7131	45	FEMALE	Negative	N0	T2	2854	Negative	Negative	Stage IIA
TCGA-B6-A0I5-01	4.1076	49	FEMALE	Negative	N1	T2	4550	Positive	Positive	Stage IIB
TCGA-B6-A0IB-01	3.6594	64	FEMALE	Negative	N3	T3	3941	Positive	Positive	Stage IV
TCGA-B6-A0IH-01	8.2269	81	FEMALE	Negative	N1	T3	3418	Positive	Positive	Stage IIIA
TCGA-B6-A0IJ-01	4.4424	42	FEMALE	Negative	N0	T3	5383	Positive	Positive	Stage IIB
TCGA-B6-A0IK-01	5.4328	63	FEMALE	Negative	N1	T4	571	Negative	Negative	Stage IIIB
TCGA-B6-A0IM-01	3.9909	75	FEMALE	Negative	N0	T3	3836	Positive	Positive	Stage IIB
TCGA-B6-A0IP-01	6.2386	74	FEMALE	Negative	N0	T1	3374	Positive	Positive	Stage IA
TCGA-B6-A0IQ-01	4.0266	40	FEMALE	Negative	N1	T3	4285	Negative	Negative	Stage IIIA
TCGA-B6-A0RG-01	7.3982	26	FEMALE	Negative	N0	T3	2082	Negative	Negative	Stage IIB
TCGA-B6-A0RH-01	5.578	51	FEMALE	Positive	N0	T2	5749	Positive	Positive	Stage IIA
TCGA-B6-A0RI-01	6.5073	44	FEMALE	Negative	N1	T4	7126	Positive	Positive	Stage IIIB
TCGA-B6-A0RL-01	1.344	60	FEMALE	Negative	N0	T2	2469	Positive	Positive	Stage IIA
TCGA-B6-A0RN-01	6.6155	60	FEMALE	Negative	N0	T1	5261	Negative	Negative	Stage IA
TCGA-B6-A0RO-01	5.1331	71	FEMALE	Negative	N1	T4	4929	Positive	Positive	Stage IIIB
TCGA-B6-A0RP-01	5.0576	73	FEMALE	Negative	N1	T2	3126	Positive	Positive	Stage IIIB
TCGA-B6-A0RQ-01	6.1301	68	FEMALE	Negative	N0	T3	4273	Positive	Positive	Stage IIB
TCGA-B6-A0RS-01	5.3041	38	FEMALE	Negative	N0	T2	3063	Negative	Negative	Stage IIA
TCGA-B6-A0RT-01	7.5997	39	FEMALE	Negative	N1	T3	2721	Negative	Negative	Stage IIIA
TCGA-B6-A0RU-01	7.8222	49	FEMALE	Negative	N0	T1	3991	Negative	Negative	Stage IA
TCGA-B6-A0RV-01	7.1874	42	FEMALE	Negative	N2	T3	4788	Positive	Positive	Stage IIIA
TCGA-B6-A0WT-01	5.393	61	FEMALE	Negative	N1	T2	5739	Positive	Positive	Stage IIB
TCGA-B6-A0WV-01	5.5648	67	FEMALE	Negative	N1	T2	2422	Positive	Positive	Stage IIB
TCGA-B6-A0WX-01	7.8788	40	FEMALE	Negative	N1	T3	653	Negative	Negative	Stage IIIA
TCGA-B6-A0WY-01	6.7623	40	FEMALE	Negative	N1	T3	3461	Positive	Negative	Stage IIIA
TCGA-B6-A0WZ-01	5.9914	50	FEMALE	Negative	N1	T2	3941	Positive	Positive	Stage IIB
TCGA-B6-A0X0-01	4.2567	54	FEMALE	Negative	N0	T1	3945	Positive	Positive	Stage IA
TCGA-B6-A0X4-01	3.015	62	FEMALE	Negative	N1	T2	860	Positive	Positive	Stage IIB
TCGA-B6-A0X5-01	1.7386	61	FEMALE	Negative	N1	T2	2097	Positive	Positive	Stage IIB
TCGA-B6-A1KF-01	4.283	68	FEMALE	Positive	N1	T2	3088	Negative	Negative	Stage IIB
TCGA-B6-A1KI-01	6.1284	63	FEMALE	Negative	N0	T1	2236	Positive	Positive	Stage I
TCGA-B6-A1KN-01	6.4855	57	FEMALE	Positive	N1	T4	4233	Negative	Negative	Stage IIIB
TCGA-BH-A0AU-01	7.2105	45	FEMALE	Negative	N0	T2	746	Positive	Positive	Stage IIA
TCGA-BH-A0AV-01	6.1737	52	FEMALE	Negative	N0	T1	1820	Negative	Negative	Stage I
TCGA-BH-A0AW-01	5.8478	56	FEMALE	Positive	N1	T1	622	Positive	Negative	Stage IIA
TCGA-BH-A0AY-01	5.6718	62	FEMALE	Negative	N0	T2	777	Positive	Positive	Stage IIA
TCGA-BH-A0AZ-01	7.1436	47	FEMALE	Negative	N1	T3	867	Positive	Positive	Stage IIIA
TCGA-BH-A0B0-01	7.734	56	FEMALE	Negative	N0	T1	1428	Positive	Positive	Stage I
TCGA-BH-A0B1-01	7.9391	66	FEMALE	Negative	N1	T2	1148	Positive	Positive	Stage IIB
TCGA-BH-A0B2-01	6.9784	43	FEMALE	Negative	N0	T1	1242	Positive	Positive	Stage I
TCGA-BH-A0B3-01	6.7409	53	FEMALE	Negative	N1	T2	1203	Negative	Negative	Stage IIB
TCGA-BH-A0B5-01	7.5297	40	FEMALE	Negative	N2	T2	1471	Positive	Positive	Stage IIIA
TCGA-BH-A0B7-01	8.1133	42	FEMALE	Positive	N1	T2	1733	Positive	Positive	Stage IIB
TCGA-BH-A0B8-01	5.3394	64	FEMALE	Negative	N0	T1	1569	Positive	Positive	Stage I
TCGA-BH-A0B9-01	7.9449	44	FEMALE	Negative	N0	T1	1572	Negative	Negative	Stage IA
TCGA-BH-A0BA-01	7.71	51	FEMALE	Negative	N3	T3	1132	Positive	Positive	Stage IIIC
TCGA-BH-A0BC-01	5.3092	60	FEMALE	Negative	N3	T2	974	Positive	Positive	Stage IIIC
TCGA-BH-A0BD-01	5.7367	47	FEMALE	Negative	N1	T1	554	Positive	Positive	Stage IIA
TCGA-BH-A0BF-01	7.1497	56	FEMALE	Negative	N1	T2	782	Positive	Positive	Stage IIB
TCGA-BH-A0BG-01	5.6626	73	FEMALE	Negative	N0	T1	756	Negative	Negative	Stage I
TCGA-BH-A0BJ-01	7.6442	41	FEMALE	Negative	N1	T2	660	Positive	Positive	Stage IIB
TCGA-BH-A0BL-01	6.8642	35	FEMALE	Negative	N0	T1	1340	Negative	Negative	Stage I
TCGA-BH-A0BM-01	7.1146	54	FEMALE	Negative	N1	T2	1876	Positive	Negative	Stage IIB
TCGA-BH-A0BO-01	7.9017	54	FEMALE	Negative	N0	T1	1085	Positive	Positive	Stage I
TCGA-BH-A0BP-01	6.7987	76	FEMALE	Negative	N0	T1	1481	Positive	Positive	Stage I
TCGA-BH-A0BQ-01	6.9992	39	FEMALE	Negative	N0	T1	827	Positive	Positive	Stage I
TCGA-BH-A0BR-01	6.9003	59	FEMALE	Negative	N0	T1	1633	Positive	Positive	Stage I
TCGA-BH-A0BS-01	5.5732	55	FEMALE	Negative	N1	T3	1641	Positive	Positive	Stage IIIA
TCGA-BH-A0BT-01	6.1139	56	FEMALE	Negative	N1	T1	1386	Positive	Positive	Stage IIA
TCGA-BH-A0BV-01	7.0386	78	FEMALE	Negative	N1	T2	1519	Positive	Positive	Stage IIB
TCGA-BH-A0BW-01	6.2991	71	FEMALE	Negative	N0	T1	355	Negative	Negative	Stage I
TCGA-BH-A0BZ-01	5.363	59	FEMALE	Negative	N1	T3	1492	Positive	Positive	Stage IIIA
TCGA-BH-A0C0-01	4.2685	62	FEMALE	Positive	N1	T1	1270	Positive	Positive	Stage IIA
TCGA-BH-A0C1-01	7.7009	61	FEMALE	Negative	N2	T3	1339	Positive	Positive	Stage IIIA
TCGA-BH-A0C3-01	9.1068	47	FEMALE	Negative	N0	T1	1464	Positive	Negative	Stage I
TCGA-BH-A0C7-01	6.717	48	FEMALE	Positive	N1	T2	1305	Positive	Negative	Stage IIB
TCGA-BH-A0DE-01	6.8276	62	FEMALE	Negative	N0	T2	948	Positive	Positive	Stage IIA
TCGA-BH-A0DG-01	8.0218	30	FEMALE	Negative	N0	T2	713	Positive	Negative	Stage IIA
TCGA-BH-A0DH-01	3.8997	63	FEMALE	Negative	N1	T2	1156	Positive	Positive	Stage IIB
TCGA-BH-A0DI-01	7.7152	63	FEMALE	Negative	N1	T2	673	Positive	Positive	Stage IIB
TCGA-BH-A0DK-01	7.6171	49	FEMALE	Negative	N0	T2	423	Positive	Positive	Stage IIA
TCGA-BH-A0DL-01	6.1951	64	FEMALE	Negative	N0	T2	1467	Positive	Negative	Stage IIA
TCGA-BH-A0DO-01	6.654	78	FEMALE	Negative	N0	T1	525	Positive	Positive	Stage I
TCGA-BH-A0DP-01	6.8828	60	FEMALE	Negative	N0	T3	476	Positive	Positive	Stage IIB
TCGA-BH-A0DQ-01	6.6004	42	FEMALE	Negative	N1	T2	98	Positive	Positive	Stage IIB
TCGA-BH-A0DS-01	4.8975	71	FEMALE	Negative	N2	T2	78	Positive	Positive	Stage IIIA
TCGA-BH-A0DT-01	8.3055	41	FEMALE	Negative	N1	T1	1170	Positive	Positive	Stage IIA
TCGA-BH-A0DV-01	8.2715	54	FEMALE	Negative	N2	T2	2064	Positive	Positive	Stage IIIA
TCGA-BH-A0DX-01	6.8204	62	FEMALE	Negative	N0	T1	1442	Positive	Positive	Stage I
TCGA-BH-A0DZ-01	6.8506	43	FEMALE	Positive	N1	T2	495	Positive	Positive	Stage IIB
TCGA-BH-A0E0-01	5.8033	38	FEMALE	Negative	N3	T3	134	Negative	Negative	Stage IIIC
TCGA-BH-A0E1-01	6.3465	52	FEMALE	Negative	N1	T2	477	Positive	Positive	Stage IIB
TCGA-BH-A0E2-01	5.1828	49	FEMALE	Negative	N2	T2	435	Positive	Positive	Stage IIIA
TCGA-BH-A0E6-01	4.3333	69	FEMALE	Negative	N0	T1	293	Negative	Negative	Stage IA
TCGA-BH-A0E7-01	3.3103	79	FEMALE	Negative	N1	T2	1363	Positive	Positive	Stage IIB
TCGA-BH-A0E9-01	8.0879	53	FEMALE	Negative	N1	T2	1405	Positive	Positive	Stage IIB
TCGA-BH-A0EA-01	7.588	72	FEMALE	Negative	N1	T1	993	Positive	Positive	Stage IIA
TCGA-BH-A0EB-01	6.8027	69	FEMALE	Negative	N0	T1	745	Positive	Positive	Stage IA
TCGA-BH-A0EE-01	9.1575	68	FEMALE	Positive	N0	T3	943	Negative	Negative	Stage IIB
TCGA-BH-A0EI-01	7.3507	51	FEMALE	Negative	N1	T1	743	Positive	Positive	Stage IIA
TCGA-BH-A0GY-01	7.1372	67	FEMALE	Negative	N1	T2	923	Positive	Positive	Stage IIA
TCGA-BH-A0GZ-01	5.7344	62	FEMALE	Negative	N1	T1	328	Positive	Positive	Stage IIA
TCGA-BH-A0H0-01	3.9064	69	FEMALE	Negative	N0	T1	461	Positive	Positive	Stage IA
TCGA-BH-A0H3-01	7.2511	46	FEMALE	Negative	N0	T1	1149	Positive	Positive	Stage I
TCGA-BH-A0H5-01	7.2788	45	FEMALE	Negative	N0	T1	1080	Positive	Positive	Stage I
TCGA-BH-A0H6-01	5.3047	82	FEMALE	Negative	N0	T1	747	Positive	Positive	Stage I
TCGA-BH-A0H7-01	6.9363	65	FEMALE	Negative	N2	T1	702	Positive	Positive	Stage IIIA
TCGA-BH-A0H9-01	5.047	69	FEMALE	Negative	N0	T2	1247	Positive	Positive	Stage IIA
TCGA-BH-A0HA-01	7.7931	31	FEMALE	Negative	N0	T1	1611	Positive	Positive	Stage I
TCGA-BH-A0HB-01	5.7443	55	FEMALE	Negative	N0	T1	806	Positive	Positive	Stage IA
TCGA-BH-A0HF-01	7.7706	77	FEMALE	Negative	N0	T1	727	Positive	Positive	Stage IA
TCGA-BH-A0HI-01	5.0898	78	FEMALE	Negative	N0	T1	620	Positive	Positive	Stage IA
TCGA-BH-A0HK-01	7.4588	81	FEMALE	Negative	N1	T2	178	Positive	Negative	Stage IIB
TCGA-BH-A0HL-01	2.4603	56	FEMALE	Negative	N1	T2	72	Positive	Positive	Stage IIB
TCGA-BH-A0HN-01	4.1804	67	FEMALE	Negative	N0	T1	516	Positive	Positive	Stage IA
TCGA-BH-A0HO-01	5.4865	48	FEMALE	Negative	N1	T1	76	Positive	Positive	Stage IIA
TCGA-BH-A0HP-01	6.3366	65	FEMALE	Negative	N2	T3	414	Positive	Negative	Stage IIIA
TCGA-BH-A0HQ-01	5.6449	56	FEMALE	Negative	N0	T2	1121	Positive	Positive	Stage IIA
TCGA-BH-A0HU-01	5.7485	52	FEMALE	Negative	N0	T1	392	Positive	Positive	Stage IA
TCGA-BH-A0HW-01	0.375	62	FEMALE	Negative	N0	T1	1561	Positive	Negative	Stage IA
TCGA-BH-A0HX-01	5.5587	54	FEMALE	Negative	N1	T2	829	Positive	Positive	Stage IIB
TCGA-BH-A0RX-01	4.2954	59	FEMALE	Negative	N0	T2	170	Negative	Negative	Stage IIA
TCGA-BH-A0W3-01	5.6109	58	FEMALE	Negative	N1	T1	728	Positive	Positive	Stage IIA
TCGA-BH-A0W4-01	6.5673	46	FEMALE	Negative	N0	T2	759	Positive	Positive	Stage IIA
TCGA-BH-A0W5-01	7.4332	77	FEMALE	Negative	N1	T1	1288	Positive	Positive	Stage IIA
TCGA-BH-A0W7-01	6.0336	49	FEMALE	Negative	N0	T1	1363	Positive	Positive	Stage I
TCGA-BH-A0WA-01	6.3528	82	FEMALE	Negative	N0	T1	701	Negative	Negative	Stage I
TCGA-BH-A18F-01	7.8313	50	FEMALE	Negative	N0	T2	268	Positive	Positive	Stage IIA
TCGA-BH-A18G-01	1.1699	81	FEMALE	Negative	N0	T1	61	Negative	Negative	Stage IA
TCGA-BH-A18H-01	6.5963	63	FEMALE	Negative	N0	T1		Positive	Positive	Stage IA
TCGA-BH-A18I-01	8.0523	53	FEMALE	Negative	N1	T1	220	Positive	Positive	Stage IIA
TCGA-BH-A18J-01	4.4573	56	FEMALE	Negative	N2	T4	612	Positive	Positive	Stage IV
TCGA-BH-A18K-01	5.1723	46	FEMALE	Negative	N0	T1	2763	Positive	Positive	Stage I
TCGA-BH-A18M-01	7.8696	39	FEMALE	Positive	N1	T3	2207	Positive	Positive	Stage IIIA
TCGA-BH-A18N-01	4.1826	88	FEMALE	Negative	N1	T2	1148	Positive	Positive	Stage IIA
TCGA-BH-A18P-01	5.4901	60	FEMALE	Negative	N0	T1	921	Positive	Negative	Stage I
TCGA-BH-A18Q-01	7.5948	56	FEMALE	Negative	N1	T2	1692	Negative	Negative	Stage IIB
TCGA-BH-A18T-01	5.8768	70	FEMALE	Negative	N0	T2	224	Negative	Negative	Stage IIA
TCGA-BH-A18U-01	4.8993	72	FEMALE	Positive	N2	T2	1563	Positive	Positive	Stage IIIA
TCGA-BH-A18V-01	5.1074	48	FEMALE	Negative	N1	T2	1556	Negative	Negative	Stage IIB
TCGA-BH-A1EN-01	3.3517	78	FEMALE	Positive	N0	T2	2053	Negative	Negative	Stage IIA
TCGA-BH-A1EO-01	6.3213	68	FEMALE	Negative	N1	T1	2798	Positive	Positive	Stage IIA
TCGA-BH-A1ES-01	5.212	35	FEMALE	Negative	N1	T2	3462	Positive	Positive	Stage IIB
TCGA-BH-A1ET-01	7.9957	55	FEMALE	Negative	N0	T1	2520	Positive	Positive	Stage I
TCGA-BH-A1EU-01	9.379	83	FEMALE	Negative	N0	T1	1286	Positive	Positive	Stage I
TCGA-BH-A1EW-01	7.9006	38	FEMALE	Negative	N1	T2	1694	Negative	Negative	Stage IIA
TCGA-BH-A1EX-01	5.1095	67	FEMALE	Negative	N1	T2	1508	Positive	Positive	Stage IIB
TCGA-BH-A1EY-01	7.2632	79	FEMALE	Negative	N0	T2	538	Positive	Positive	Stage IIA
TCGA-BH-A1F2-01	6.4158	53	FEMALE	Positive	N1	T4	959	Positive	Positive	Stage IIIB
TCGA-BH-A1F8-01	5.6326	90	FEMALE	Negative	N2	T4	749	Positive	Positive	Stage IIIB
TCGA-BH-A1FB-01	8.1906	60	FEMALE	Negative	N1	T2	3669	Positive	Positive	Stage IIB
TCGA-BH-A1FC-01	4.0526	78	FEMALE	Negative	N1	T1	3472	Negative	Negative	Stage IIA
TCGA-BH-A1FD-01	3.871	68	FEMALE	Negative	N0	T1	1009	Positive	Positive	Stage I
TCGA-BH-A1FE-01	9.0767	31	FEMALE	Negative	N1	T2	2273	Positive	Positive	Stage IIB
TCGA-BH-A1FH-01	10.2734	47	FEMALE	Negative	N1	T2	1123	Positive	Negative	Stage IV
TCGA-BH-A1FJ-01	3.7302	66	FEMALE	Negative	N1	T3	1927	Negative	Positive	Stage IIIA
TCGA-BH-A1FL-01	4.5863	69	FEMALE	Negative	N1	T2	1673	Positive	Positive	Stage IIB
TCGA-BH-A1FM-01	7.0067	44	FEMALE	Negative	N2	T2	1388	Positive	Negative	Stage IIIA
TCGA-BH-A1FN-01	5.5455	34	FEMALE	Negative	N0	T2	2192	Positive	Positive	Stage IIA
TCGA-BH-A1FR-01	4.2189	73	FEMALE	Negative	N1	T4	4398	Positive	Positive	Stage IIIB
TCGA-BH-A1FU-01	7.9932	44	FEMALE	Positive	N0	T1	2192	Negative	Negative	Stage IA
TCGA-C8-A12L-01	4.6057	67	FEMALE	Positive	N0	T2	363	Negative	Negative	Stage IIA
TCGA-C8-A12N-01	6.5061	58	FEMALE	Negative	N0	T2	358	Positive	Positive	Stage IIA
TCGA-C8-A12P-01	5.8659	55	FEMALE	Positive	N1	T2	358	Negative	Negative	Stage IIB
TCGA-C8-A12Q-01	7.5282	78	FEMALE	Positive	N2	T1	385	Negative	Negative	Stage IIIA
TCGA-C8-A12T-01	5.0444	43	FEMALE	Positive	N0	T2		Positive	Positive	Stage IIA
TCGA-C8-A12U-01	3.5623	46	FEMALE	Negative	N1	T2	385	Positive	Positive	Stage IIB
TCGA-C8-A12V-01	10.7795	55	FEMALE	Negative	N0	T2	385	Negative	Negative	Stage IIA
TCGA-C8-A12W-01	6.0853	49	FEMALE	Negative	N1	T4	385	Positive	Positive	Stage IIIB
TCGA-C8-A12X-01	1.9552	62	FEMALE	Negative	N1	T2	385	Positive	Positive	Stage IIB
TCGA-C8-A12Z-01	5.1465	45	FEMALE	Positive	N1	T2	12	Negative	Negative	Stage IIB
TCGA-C8-A131-01	3.7562	82	FEMALE	Negative	N2	T2	68	Negative	Negative	Stage IIIA
TCGA-C8-A132-01	6.7999	56	FEMALE	Positive	N1	T2	57	Positive	Positive	Stage IIB
TCGA-C8-A134-01	4.688	52	FEMALE	Negative	N0	T2	34	Negative	Negative	Stage IIA
TCGA-C8-A135-01	6.2846	64	FEMALE	Positive	N1	T2	32	Negative	Negative	Stage IIB
TCGA-C8-A137-01	6.2047	34	FEMALE	Positive	N1	T2	125	Negative	Negative	Stage IIB
TCGA-C8-A138-01	6.1573	54	FEMALE	Positive	N2	T2	124	Positive	Negative	Stage IIIA
TCGA-C8-A1HE-01	5.3262	59	FEMALE	Negative	N0	T2	375	Positive	Positive	Stage IIA
TCGA-C8-A1HF-01	4.2112	48	FEMALE	Positive	N0	T2	332	Negative	Positive	Stage IIA
TCGA-C8-A1HG-01	4.1588	50	FEMALE	Negative	N0	T2	345	Positive	Positive	Stage IIA
TCGA-C8-A1HI-01	5.2965	40	FEMALE	Negative	N2	T2	343	Positive	Positive	Stage IIIA
TCGA-C8-A1HJ-01	5.3422	53	FEMALE	Negative	N0	T2	5	Negative	Negative	Stage IIA
TCGA-C8-A1HK-01	3.1702	53	FEMALE	Positive	N1	T2	366	Negative	Negative	Stage IIB
TCGA-C8-A1HL-01	6.3494	38	FEMALE	Positive	N1	T3	317	Positive	Negative	Stage IIIA
TCGA-C8-A1HM-01	2.9315	74	FEMALE	Negative	N0	T2	70	Positive	Positive	Stage IIA
TCGA-C8-A1HO-01	5.1516	34	FEMALE	Negative	N3	T3		Positive	Positive	Stage IIIC
TCGA-C8-A26V-01	3.8217	47	FEMALE	Negative	N2	T3	9	Positive	Positive	Stage IIIA
TCGA-C8-A26W-01	6.8642	58	FEMALE	Positive	N1	T2	7	Positive	Positive	Stage IIB
TCGA-C8-A26X-01	5.2901	58	FEMALE	Negative	N1	T1	11	Negative	Negative	Stage IIA
TCGA-C8-A26Y-01	2.8317	90	FEMALE	Negative	N0	T2	13	Negative	Negative	Stage IIA
TCGA-C8-A26Z-01	6.1815	59	FEMALE	Negative	N0	T2	252	Positive	Positive	Stage IIA
TCGA-C8-A273-01	6.3094	29	FEMALE	Negative	N1	T2	294	Positive	Positive	Stage IIB
TCGA-C8-A274-01	3.6885	63	FEMALE	Negative	N0	T2	290	Positive	Positive	Stage IIA
TCGA-C8-A278-01	6.7004	61	FEMALE	Positive	N2	T2	289	Negative	Negative	Stage IIIA
TCGA-C8-A27A-01	4.4339	48	FEMALE	Negative	N1	T2	371	Positive	Positive	Stage IIB
TCGA-C8-A27B-01	4.1881	48	FEMALE	Negative	N0	T3	30	Negative	Negative	Stage IIB
TCGA-D8-A13Y-01	4.1233	52	FEMALE	Negative	N0	T1	362	Positive	Positive	Stage IA
TCGA-D8-A140-01	5.503	62	FEMALE	Positive	N1	T2	403	Positive	Positive	Stage IIB
TCGA-D8-A142-01	7.0144	74	FEMALE	Negative	N0	T3	425	Negative	Negative	Stage IIB
TCGA-D8-A143-01	5.4881	51	FEMALE	Negative	N0	T2	431	Negative	Negative	Stage IIA
TCGA-D8-A145-01	8.0071	80	FEMALE	Negative	N1	T1	410	Positive	Positive	Stage IIA
TCGA-D8-A146-01	6.4861	57	FEMALE	Negative	N0	T2	643	Positive	Positive	Stage IIA
TCGA-D8-A1J8-01	6.5225	77	FEMALE	Negative	N1	T2	431	Positive	Positive	Stage IIB
TCGA-D8-A1J9-01	4.3844	48	FEMALE	Positive	N0	T1	532	Positive	Negative	Stage IA
TCGA-D8-A1JB-01	6.9231	54	FEMALE	Positive	N1	T2	569	Positive	Positive	Stage IIB
TCGA-D8-A1JC-01	6.4193	59	FEMALE	Negative	N2	T2	480	Positive	Positive	Stage IIIA
TCGA-D8-A1JD-01	6.962	41	FEMALE	Negative	N1	T2	552	Positive	Positive	Stage IIB
TCGA-D8-A1JE-01	3.4904	62	FEMALE	Negative	N1	T1	575	Positive	Positive	Stage IIA
TCGA-D8-A1JF-01	5.3371	79	FEMALE	Negative	N2	T1	366	Negative	Negative	Stage IIIA
TCGA-D8-A1JG-01	5.4058	62	FEMALE	Negative	N0	T2	366	Negative	Negative	Stage IIA
TCGA-D8-A1JH-01	7.1072	56	FEMALE	Negative	N0	T1	426	Positive	Positive	Stage IA
TCGA-D8-A1JI-01	1.8878	54	FEMALE	Negative	N1	T1	577	Positive	Positive	Stage IIA
TCGA-D8-A1JJ-01	4.9267	54	FEMALE	Negative	N0	T2	611	Positive	Positive	Stage IIA
TCGA-D8-A1JK-01	4.887	90	FEMALE	Negative	N0	T2	612	Negative	Positive	Stage IIA
TCGA-D8-A1JL-01	6.3689	72	FEMALE	Negative	N0	T2	611	Negative	Negative	Stage IIA
TCGA-D8-A1JM-01	7.3303	59	FEMALE	Negative	N1	T2	590	Positive	Negative	Stage IIB
TCGA-D8-A1JN-01	3.5063	80	FEMALE	Negative	N3	T3	620	Positive	Positive	Stage IIIC
TCGA-D8-A1JP-01	6.6291	73	FEMALE	Negative	N0	T1	639	Positive	Positive	Stage IA
TCGA-D8-A1JS-01	1.7056	77	FEMALE	Negative	N0	T1	371	Positive	Positive	Stage IA
TCGA-D8-A1JT-01	2.3699	70	FEMALE	Negative	N0	T2	405	Positive	Positive	Stage IIA
TCGA-D8-A1JU-01	9.0973	51	FEMALE	Negative	N0	T1	447	Positive	Positive	Stage IA
TCGA-D8-A1X5-01	5.7842	81	FEMALE	Positive	N3	T2	565	Positive	Positive	Stage IIIC
TCGA-D8-A1X6-01	2.2711	80	FEMALE	Negative	N2	T3	541	Positive	Positive	Stage IIIA
TCGA-D8-A1X7-01	6.5053	40	FEMALE	Negative	N0	T2	509	Positive	Positive	Stage IIA
TCGA-D8-A1X9-01	3.4416	66	FEMALE	Negative	N1	T2	727	Positive	Positive	Stage IIB
TCGA-D8-A1XA-01	5.1817	64	FEMALE	Negative	N0	T1	839	Positive	Positive	Stage IA
TCGA-D8-A1XB-01	7.2812	62	FEMALE	Negative	N1	T2	552	Positive	Positive	Stage IIB
TCGA-D8-A1XC-01	2.5538	85	FEMALE	Negative	N1	T4	377	Positive	Positive	Stage IIIB
TCGA-D8-A1XD-01	6.9167	36	FEMALE	Negative	N2	T1	522	Positive	Positive	Stage IIIA
TCGA-D8-A1XF-01	5.6416	45	FEMALE	Negative	N0	T2	463	Positive	Positive	Stage IIA
TCGA-D8-A1XG-01	4.8112	86	FEMALE	Negative	N1	T4	448	Positive	Negative	Stage IIIB
TCGA-D8-A1XJ-01	2.99	76	FEMALE	Positive	N1	T3	664	Positive	Positive	Stage IIIA
TCGA-D8-A1XK-01	4.0185	55	FEMALE	Negative	N1	T2	441	Negative	Negative	Stage IIB
TCGA-D8-A1XL-01	3.1787	34	FEMALE	Negative	N1	T2	606	Positive	Positive	Stage IIB
TCGA-D8-A1XM-01	7.7806	57	FEMALE	Negative	N0	T1	538	Positive	Positive	Stage IA
TCGA-D8-A1XO-01	8.6009	56	FEMALE	Negative	N1	T2	473	Positive	Positive	Stage IIB
TCGA-D8-A1XQ-01	4.355	69	FEMALE	Negative	N0	T2	499	Negative	Negative	Stage IIA
TCGA-D8-A1XR-01	3.2855	56	FEMALE	Negative	N1	T2	482	Positive	Positive	Stage IIB
TCGA-D8-A1XT-01	5.0565	61	FEMALE	Positive	N1	T1	193	Negative	Negative	Stage IIA
TCGA-D8-A1XU-01	8.1286	56	FEMALE	Negative	N0	T1	395	Positive	Positive	Stage IA
TCGA-D8-A1XV-01	3.1257	84	FEMALE	Negative	N0	T2	461	Positive	Positive	Stage IIA
TCGA-D8-A1XW-01	4.5217	53	FEMALE	Negative	N0	T2	385	Negative	Positive	Stage IIA
TCGA-D8-A1XY-01	6.3685	74	FEMALE	Positive	N0	T2	503	Positive	Positive	Stage IIA
TCGA-D8-A1XZ-01	5.6933	81	FEMALE	Negative	N2	T1	466	Positive	Negative	Stage IIIA
TCGA-D8-A1Y0-01	8.3265	65	FEMALE	Negative	N2	T1	472	Positive	Positive	Stage IIIA
TCGA-D8-A1Y1-01	4.9112	80	FEMALE	Negative	N1	T3	302	Positive	Positive	Stage IIIA
TCGA-D8-A1Y2-01	5.2117	71	FEMALE	Negative	N0	T2	433	Positive	Positive	Stage IIA
TCGA-D8-A1Y3-01	3.6641	61	FEMALE	Negative	N2	T2	430	Positive	Positive	Stage IIIA
TCGA-D8-A27E-01	2.0592	66	FEMALE	Negative	N0	T1	530	Positive	Positive	Stage IA
TCGA-D8-A27F-01	5.9269	40	FEMALE	Negative	N0	T2	488	Negative	Negative	Stage IIA
TCGA-D8-A27G-01	6.5779	75	FEMALE	Negative	N0	T2	409	Positive	Positive	Stage IIA
TCGA-D8-A27H-01	8.2333	72	FEMALE	Negative	N0	T2	397	Negative	Negative	Stage IIA
TCGA-D8-A27I-01	8.4326	58	FEMALE	Negative	N2	T1	439	Positive	Positive	Stage IIIA
TCGA-D8-A27K-01	6.5566	47	FEMALE	Negative	N1	T2	287	Positive	Positive	Stage IIB
TCGA-D8-A27L-01	7.6692	49	FEMALE	Negative	N2	T1	499	Positive	Positive	Stage IIIA
TCGA-D8-A27M-01	6.09	59	FEMALE	Negative	N0	T1	410	Negative	Negative	Stage IA
TCGA-D8-A27N-01	5.5951	36	FEMALE	Positive	N2	T2	146	Positive	Positive	Stage IIIA
TCGA-D8-A27P-01	5.7911	64	FEMALE	Negative	N0	T1	23	Positive	Positive	Stage IA
TCGA-D8-A27R-01	6.6218	41	FEMALE	Negative	N3	T2	307	Positive	Positive	Stage IIIC
TCGA-D8-A27T-01	7.4218	53	FEMALE	Negative	N3	T2	398	Positive	Positive	Stage IIIC
TCGA-D8-A27V-01	7.7378	62	FEMALE	Negative	N0	T2	381	Positive	Positive	Stage IIA
TCGA-D8-A27W-01	5.7616	55	FEMALE	Positive	N0	T4	373	Positive	Positive	Stage IIIB
TCGA-E2-A106-01	4.1126	34	FEMALE	Negative	N1	T1	1807	Positive	Positive	Stage IB
TCGA-E2-A107-01	3.4916	54	FEMALE	Negative	N2	T3	1047	Positive	Negative	Stage IIIA
TCGA-E2-A108-01	8.0607	64	FEMALE	Negative	N2	T2	837	Positive	Positive	Stage IIIA
TCGA-E2-A109-01	5.8025	64	FEMALE	Negative	N0	T2	1417	Positive	Negative	Stage IIA
TCGA-E2-A10A-01	5.0726	41	FEMALE	Negative	N0	T3	1229	Positive	Positive	Stage IIB
TCGA-E2-A10B-01	5.3814	67	FEMALE	Negative	N1	T2	1141	Positive	Positive	Stage IIB
TCGA-E2-A10C-01	3.1063	54	FEMALE	Negative	N1	T2	1220	Positive	Positive	Stage IIB
TCGA-E2-A10E-01	5.6577	64	FEMALE	Negative	N1	T1	865	Positive	Positive	Stage IIA
TCGA-E2-A10F-01	6.3577	47	FEMALE	Negative	N0	T2	878	Positive	Positive	Stage IIA
TCGA-E2-A14N-01	6.4902	37	FEMALE	Negative	N1	T2	1434	Negative	Negative	Stage IIB
TCGA-E2-A14O-01	3.1069	76	FEMALE	Negative	N1	T3	1359	Positive	Positive	Stage IIIA
TCGA-E2-A14P-01	5.7405	79	FEMALE	Positive	N3	T2	1246	Negative	Negative	Stage IIIC
TCGA-E2-A14Q-01	6.2606	50	FEMALE	Negative	N1	T2	1163	Positive	Positive	Stage IIA
TCGA-E2-A14R-01	3.0595	62	FEMALE	Negative	N0	T2	1174	Negative	Negative	Stage IIA
TCGA-E2-A14S-01	5.1233	65	FEMALE	Negative	N0	T1	1009	Positive	Positive	Stage I
TCGA-E2-A14T-01	4.6722	52	FEMALE	Negative	N0	T2	1013	Positive	Positive	Stage IIA
TCGA-E2-A14V-01	6.3764	53	FEMALE	Positive	N1	T2	1042	Positive	Positive	Stage IIB
TCGA-E2-A14X-01	5.7924	55	FEMALE	Negative	N2	T2	972	Negative	Negative	Stage IIIA
TCGA-E2-A14Y-01	4.3637	35	FEMALE	Positive	N0	T2	870	Positive	Positive	Stage IIA
TCGA-E2-A14Z-01	6.6773	64	FEMALE	Negative	N0	T1	563	Positive	Positive	Stage I
TCGA-E2-A150-01	5.5083	48	FEMALE	Negative	N0	T2	773	Negative	Negative	Stage IIA
TCGA-E2-A152-01	6.3032	56	FEMALE	Positive	N0	T1	825	Positive	Negative	Stage I
TCGA-E2-A153-01	4.8203	51	FEMALE	Negative	N1	T1	707	Positive	Positive	Stage IIB
TCGA-E2-A154-01	5.2584	68	FEMALE	Negative	N0	T1	591	Positive	Positive	Stage I
TCGA-E2-A155-01	4.0212	58	FEMALE	Negative	N1	T2	640	Positive	Negative	Stage IIB
TCGA-E2-A156-01	2.7534	61	FEMALE	Negative	N0	T1	726	Positive	Positive	Stage I
TCGA-E2-A158-01	3.4055	43	FEMALE	Negative	N1	T1	450	Negative	Negative	Stage IIA
TCGA-E2-A159-01	3.3117	50	FEMALE	Negative	N0	T2	762	Negative	Negative	Stage IIA
TCGA-E2-A15A-01	6.2514	45	FEMALE	Negative	N3	T2	710	Positive	Positive	Stage IIIC
TCGA-E2-A15C-01	5.9864	61	FEMALE	Negative	N0	T1	694	Positive	Positive	Stage I
TCGA-E2-A15D-01	5.2395	47	FEMALE	Negative	N0	T2	526	Positive	Positive	Stage IIA
TCGA-E2-A15E-01	7.0003	40	FEMALE	Positive	N1	T1	630	Positive	Positive	Stage IIA
TCGA-E2-A15F-01	4.4115	64	FEMALE	Negative	N0	T2	658	Positive	Positive	Stage I
TCGA-E2-A15G-01	3.8191	76	FEMALE	Negative	N0	T2	554	Positive	Positive	Stage IIA
TCGA-E2-A15H-01	7.1234	38	FEMALE	Positive	N1	T1	393	Positive	Positive	Stage IIA
TCGA-E2-A15I-01	6.5747	44	FEMALE	Negative	N0	T2	530	Positive	Positive	Stage IIA
TCGA-E2-A15J-01	1.7964	51	FEMALE	Negative	N0	T1	590	Positive	Positive	Stage I
TCGA-E2-A15K-01	4.3589	58	FEMALE	Negative	N1	T2	275	Positive	Positive	Stage IIA
TCGA-E2-A15L-01	7.08	65	FEMALE	Negative	N0	T2	626	Positive	Positive	Stage IIA
TCGA-E2-A15M-01	6.8643	66	FEMALE	Negative	N0	T2	336	Positive	Positive	Stage IIA
TCGA-E2-A15O-01	4.6381	89	FEMALE	Negative	N0	T2	396	Positive	Positive	Stage I
TCGA-E2-A15P-01	6.6993	61	FEMALE	Negative	N0	T1	595	Positive	Positive	Stage IA
TCGA-E2-A15R-01	5.0783	64	FEMALE	Negative	N1	T1	519	Positive	Positive	Stage IIA
TCGA-E2-A15S-01	5.2624	34	FEMALE	Negative	N1	T2	428	Positive	Negative	Stage IIB
TCGA-E2-A15T-01	4.3976	65	FEMALE	Negative	N0	T2	456	Positive	Positive	Stage IIA
TCGA-E2-A1AZ-01	6.9805	63	FEMALE	Negative	N1	T2	2329	Negative	Negative	Stage IIB
TCGA-E2-A1B0-01	6.786	50	FEMALE	Positive	N2	T2	1631	Negative	Negative	Stage IIIA
TCGA-E2-A1B1-01	8.4431	45	FEMALE	Positive	N1	T2	1613	Positive	Positive	Stage IIB
TCGA-E2-A1B4-01	4.3244	74	FEMALE	Negative	N2	T1	1004	Positive	Positive	Stage IIIA
TCGA-E2-A1B5-01	6.3517	46	FEMALE	Negative	N0	T2	984	Positive	Positive	Stage IIA
TCGA-E2-A1B6-01	5.9881	44	FEMALE	Negative	N0	T2	867	Negative	Negative	Stage IIA
TCGA-E2-A1BC-01	6.3319	63	FEMALE	Negative	N0	T1	501	Positive	Positive	Stage IA
TCGA-E2-A1BD-01	3.9157	53	FEMALE	Negative	N0	T2	520	Positive	Positive	Stage IIA
TCGA-E2-A1IE-01	5.4628	61	FEMALE	Negative	N1	T2	1165	Positive	Positive	Stage IIB
TCGA-E2-A1IF-01	6.4109	74	FEMALE	Negative	N0	T1	1138	Positive	Positive	Stage I
TCGA-E2-A1IH-01	4.7681	80	FEMALE	Negative	N0	T1	1026	Positive	Positive	Stage I
TCGA-E2-A1II-01	11.9742	51	FEMALE	Negative	N0	T1	1025	Negative	Positive	Stage I
TCGA-E2-A1IJ-01	7.441	57	FEMALE	Negative	N0	T1	865	Positive	Positive	Stage I
TCGA-E2-A1IK-01	3.663	71	FEMALE	Negative	N1	T1	689	Positive	Positive	Stage IIA
TCGA-E2-A1IL-01	6.9583	78	FEMALE	Negative	N1	T1	118	Positive	Positive	Stage IIA
TCGA-E2-A1IN-01	5.5727	60	FEMALE	Negative	N0	T1	675	Positive	Positive	Stage I
TCGA-E2-A1IO-01	8.8801	37	FEMALE	Negative	N0	T1	638	Positive	Positive	Stage I
TCGA-E2-A1IP-01	5.841	42	FEMALE	Negative	N1	T2	659	Positive	Negative	Stage IIB
TCGA-E2-A1IU-01	5.0473	60	FEMALE	Negative	N0	T1	337	Positive	Positive	Stage IA
TCGA-E2-A1L6-01	7.4478	44	FEMALE	Negative	N1	T1	1648	Positive	Positive	Stage IIA
TCGA-E2-A1L7-01	5.9117	40	FEMALE	Negative	N2	T2	834	Negative	Negative	Stage IIIA
TCGA-E2-A1L8-01	6.0458	52	FEMALE	Negative	N1	T2	1205	Positive	Positive	Stage IIA
TCGA-E2-A1L9-01	4.7906	40	FEMALE	Negative	N1	T1	598	Positive	Positive	Stage IIA
TCGA-E2-A1LA-01	4.5114	59	FEMALE	Negative	N1	T1	748	Positive	Positive	Stage IIA
TCGA-E2-A1LB-01	2.4576	41	FEMALE	Positive	N1	T2	1231	Negative	Negative	Stage IIB
TCGA-E2-A1LG-01	4.5306	50	FEMALE	Negative	N0	T2	574	Negative	Negative	Stage IIA
TCGA-E2-A1LH-01	5.4412	59	FEMALE	Negative	N0	T1	3247	Negative	Negative	Stage I
TCGA-E2-A1LI-01	3.1879	57	FEMALE	Negative	N1	T2	3121	Negative	Negative	Stage IIB
TCGA-E2-A1LK-01	2.5098	84	FEMALE	Negative	N1	T3	266	Negative	Negative	Stage IIIC
TCGA-E2-A1LL-01	4.1455	73	FEMALE	Negative	N2	T3	1309	Negative	Negative	Stage IIIA
TCGA-E2-A1LS-01	7.0836	46	FEMALE	Negative	N0	T1	470	Negative	Negative	Stage IA
TCGA-E9-A1N4-01	8.0062	41	FEMALE	Negative	N2	T2	1000	Positive	Positive	Stage IIIA
TCGA-E9-A1N5-01	5.8378	45	FEMALE	Negative	N1	T2	1120	Positive	Positive	Stage IIB
TCGA-E9-A1N6-01	4.1397	52	FEMALE	Positive	N1	T2	410	Positive	Positive	Stage IIB
TCGA-E9-A1N9-01	6.5082	58	FEMALE	Negative	N0	T2	399	Negative	Positive	Stage IIA
TCGA-E9-A1NA-01	6.8698	58	FEMALE	Negative	N0	T2	1112	Positive	Positive	Stage IIA
TCGA-E9-A1NC-01	5.0107	61	FEMALE	Negative	N1	T2	1203	Negative	Positive	Stage IIB
TCGA-E9-A1ND-01	4.2088	75	FEMALE	Negative	N1	T2	383	Negative	Negative	Stage IIB
TCGA-E9-A1NE-01	9.2259	28	FEMALE	Negative	N1	T2	1088	Positive	Positive	Stage IIB
TCGA-E9-A1NF-01	6.2581	60	FEMALE	Negative	N0	T2	1072	Positive	Positive	Stage IIA
TCGA-E9-A1NG-01	5.6963	62	FEMALE	Negative	N0	T2	786	Positive	Positive	Stage IIA
TCGA-E9-A1NH-01	6.2757	71	FEMALE	Negative	N1	T2		Positive	Positive	Stage IIB
TCGA-E9-A1NI-01	4.8912	51	FEMALE	Negative	N0	T2	300	Positive	Positive	Stage IIA
TCGA-E9-A1R2-01	6.7995	51	FEMALE	Negative	N3	T2	19	Positive	Negative	Stage IIIC
TCGA-E9-A227-01	6.7032	42	FEMALE	Negative	N1	T2	24	Positive	Positive	Stage IIB
TCGA-E9-A22A-01	6.9509	74	FEMALE	Negative	N0	T2	1189	Positive	Negative	Stage IIA
TCGA-E9-A22B-01	5.2738	71	FEMALE	Negative	N0	T1	692	Positive	Negative	Stage IA
TCGA-E9-A22D-01	3.5641	38	FEMALE	Positive	N0	T2	1248	Positive	Positive	Stage IIA
TCGA-E9-A22E-01	5.4976	56	FEMALE	Negative	N2	T2	392	Positive	Positive	Stage IIIA
TCGA-E9-A22G-01	6.5826	47	FEMALE	Negative	N0	T2	715	Negative	Negative	Stage IIA
TCGA-E9-A22H-01	4.7801	42	FEMALE	Negative	N1	T2	630	Positive	Positive	Stage IIB
TCGA-EW-A1IW-01	6.8519	80	FEMALE	Positive	N1	T2	371	Positive	Positive	Stage IIB
TCGA-EW-A1IX-01	7.4203	48	FEMALE	Negative	N1	T1	1208	Positive	Positive	Stage IIA
TCGA-EW-A1IY-01	6.4672	38	FEMALE	Negative	N0	T1	258	Positive	Positive	Stage I
TCGA-EW-A1IZ-01	4.8689	53	FEMALE	Negative	N2	T2	554	Positive	Positive	Stage IIIA
TCGA-EW-A1J1-01	4.0635	38	FEMALE	Negative	N1	T2	575	Positive	Positive	Stage IIB
TCGA-EW-A1J2-01	7.3438	50	FEMALE	Negative	N1	T1	403	Positive	Positive	Stage IIB
TCGA-EW-A1J3-01	5.188	61	FEMALE	Positive	N0	T1	504	Positive	Positive	Stage IA
TCGA-EW-A1J5-01	7.5392	59	FEMALE	Negative	N0	T3	477	Positive	Positive	Stage IIB
TCGA-EW-A1J6-01	3.7782	70	FEMALE	Negative	N0	T1	875	Positive	Positive	Stage I
TCGA-EW-A1OV-01	5.5016	56	FEMALE	Negative	N1	T2	789	Negative	Negative	Stage IIB
TCGA-EW-A1OW-01	6.4009	58	FEMALE	Negative	N0	T2	694	Negative	Negative	Stage IIA
TCGA-EW-A1OX-01	2.5066	43	FEMALE	Negative	N0	T2	911	Positive	Positive	Stage IIA
TCGA-EW-A1OY-01	5.8542	63	FEMALE	Negative	N0	T2	908	Positive	Positive	Stage IIA
TCGA-EW-A1OZ-01	5.6725	56	FEMALE	Positive	N0	T2	1229	Positive	Negative	Stage IIA
TCGA-EW-A1P0-01	3.3128	55	FEMALE	Negative	N1	T2	1251	Positive	Negative	Stage IIB
TCGA-EW-A1P1-01	8.0619	68	FEMALE	Negative	N3	T2	1210	Negative	Negative	Stage IIIC
TCGA-EW-A1P3-01	6.9303	48	FEMALE	Negative	N0	T2	1611	Positive	Positive	Stage IIA
TCGA-EW-A1P4-01	5.4054	43	FEMALE	Negative	N0	T2	907	Negative	Negative	Stage IIA
TCGA-EW-A1P5-01	5.1086	77	FEMALE	Negative	N1	T2	703	Positive	Positive	Stage IIB
TCGA-EW-A1P6-01	5.3085	64	FEMALE	Negative	N1	T2	562	Positive	Positive	Stage IIB
TCGA-EW-A1P7-01	8.4023	59	FEMALE	Negative	N0	T2	915	Negative	Negative	Stage IIA
TCGA-EW-A1P8-01	6.7761	58	FEMALE	Negative	N3	T2	239	Negative	Negative	Stage IIIC
TCGA-EW-A1PA-01	6.6903	59	FEMALE	Negative	N1	T2	575	Positive	Positive	Stage IIB
TCGA-EW-A1PB-01	5.1898	70	FEMALE	Negative	N1	T3	608	Negative	Negative	Stage IIIA
TCGA-EW-A1PE-01	5.1558	56	FEMALE	Negative	N1	T1	320	Positive	Positive	Stage IIA
TCGA-EW-A1PF-01	7.1282	50	FEMALE	Negative	N0	T1	439	Positive	Positive	Stage IA
TCGA-EW-A1PG-01	6.9694	53	FEMALE	Negative	N1	T2	1051	Positive	Positive	Stage IIB
