# Supplementary material for: Immunoglobulin superfamily member 10 is a novel prognostic biomarker for breast cancer
Source: PeerJ. 2020 Oct 21;8:e10128. doi: 10.7717/peerj.10128 (PMC7585383; doi:10.7717/peerj.10128)
Supplement: Supplemental Information 5 [file peerj-08-10128-s005.xlsx]

## Sheet: Sheet1
OS(month)	LOW	HIGH	RFS(month)	HIGH	LOW
52.0333	0		1.06667	0
99.6333	0		1.9	0
100.633	0		2.76667	1
2.03333	0		2.8	0
82.3	1		3.93333	0
12.3667	0		4.13333	0
69.9	1		4.16667	0
19.6667	0		4.76667	1
38.5333	0		5.33333	0
19.2333	0		5.66667	0
13.9	0		6.26667	1
12.8333	0		6.9	1
0.333333	0		8.1	0
17.6667	0		8.4	0
21.7	0		8.6	0
28.7667	0		8.93333	1
1.03333	0		9.56667	0
18.0333	0		9.63333	0
13.5	0		9.8	0
41.0333	0		10.2333	0
2.4	0		10.3667	1
33.5333	0		10.5667	0
30.3667	0		10.7333	0
8.86667	1		11.2	0
12.5667	1		11.9333	0
56.1	0		11.9333	0
7.1	0		12.1667	0
24.2	0		12.1667	0
1.03333	0		12.3667	0
0.433333	0		12.7	0
0.333333	0		12.8333	0
2.33333	0		12.8333	0
66.2667	0		13.1	0
1.73333	0		13.1667	0
22.1333	0		13.2	0
26.3667	0		13.2	0
28.6667	1		13.2	0
39.1333	0		13.2333	0
76.6	0		13.2667	0
40.6667	0		13.3	0
10.1333	1		13.4333	0
45.3	0		13.6333	0
15.3667	0		13.6667	0
17.7667	0		13.6667	0
30.2	0		14.1667	0
7.46667	0		14.2	0
12.2	0		14.2	0
20.2	0		14.3667	0
104.033	0		14.6333	0
20.4667	1		14.6333	0
7.13333	0		14.9	1
16.0667	0		15.2333	0
45.7	0		15.6667	0
62.7	0		15.7333	0
45.4333	0		15.7667	0
25.4	0		15.9	0
41.7	0		16	0
31.4333	1		16.2667	0
68.4333	1		16.6333	0
1.8	0		16.7	0
15.8333	0		16.7	0
0.333333	0		16.7667	0
80.1	0		16.9667	0
15	0		17.2667	0
1	0		17.4	0
24.2333	0		17.4333	0
56.2	0		17.6	0
27.5	1		17.6667	0
19.1667	0		17.9333	0
34.9	0		18.2	0
20.6667	0		18.4	0
0.166667	0		18.4	0
12.8333	0		18.4	0
41.6	0		18.4667	0
33.4667	0		18.8333	0
18.8667	0		18.9667	0
33.4667	0		19.1667	0
33.2333	0		19.1667	0
28.4	0		19.2333	0
131.367	1		19.2333	0
22.9667	0		19.2333	0
14.3333	0		19.5333	1
9.66667	0		19.6	0
19.8333	0		19.6667	0
38.5667	0		19.8333	0
64.2333	1		20.3667	0
5.8	1		20.5333	0
89.8333	0		20.7333	0
2.26667	0		20.8	0
29.1667	0		20.8667	0
21.4333	0		20.9	0
67.7	0		21	0
97.0333	1		21.0333	0
18.4667	0		21.2667	0
0.3	0		21.3	0
33.6333	1		21.3333	0
42.9333	0		21.4333	0
38.5333	0		21.6667	0
15.3667	0		21.9667	0
17.3333	0		21.9667	0
76.6	0		22.0333	0
127.867	0		22.6667	0
17.2667	0		22.7667	0
14.7	0		23.1333	0
53.8	0		23.1333	0
21.3333	0		23.3667	0
142.833	0		23.6667	0
85.0333	1		23.8	0
115.733	1		23.8333	0
19.1667	0		24.0667	0
0.3	0		24.1	0
31.4	0		24.3	1
151.667	0		24.6	0
60.2333	0		25.0667	0
12.0667	0		25.2	1
14.2	1		25.3	0
55.7667	0		25.3333	0
25.1333	1		25.4	1
13.6667	0		25.5	0
43.6333	0		25.6333	0
11.5	0		26.4	0
17.2	0		26.6	0
38.2667	1		27.3	0
1	0		27.8	0
12.7667	0		27.9	0
64	1		28.8333	0
11.0667	0		28.9	0
64.9333	0		29.2667	0
146.6	1		30.1667	0
0.333333	0		30.2667	0
131.5	1		31.8	0
42.3333	0		32.1667	0
35.0333	0		32.1667	0
35.5333	0		32.2667	0
159.2	0		32.4	0
102.933	0		32.8	0
29.3667	0		32.9667	0
5.66667	0		33.3333	0
33.4667	1		33.5667	0
9.76667	0		33.8	1
38.8333	0		34.1667	0
0.333333	0		34.2	0
38.3333	0		34.4667	0
38	0		34.7333	0
16.6333	0		34.7667	0
9.16667	0		35.0333	0
29	0		35.5333	0
37.5667	1		35.7333	0
32.5	0		36.2667	0
17.7333	0		36.6667	1
15.2	0		37.0667	0
21.9333	0		37.3	0
100.3	0		37.3333	0
12.3667	0		37.5667	0
43.6667	0		37.7333	0
7.7	0		37.9333	0
179.433	0		37.9667	0
20.4	1		38.2667	0
54.7333	0		38.7667	0
8.5	1		39.6333	0
113.633	1		40.1	0
35.8	0		40.1667	0
24.9333	0		40.2667	0
29.1667	0		40.5333	0
12.8333	0		42.5667	0
15.2667	0		42.9333	0
110.233	0		44.1667	0
19.1333	0		44.3333	0
20.2333	0		44.9	0
73	0		45.4333	0
55.7667	1		47.1333	1
11.1333	0		47.2333	0
34.2333	0		47.8	0
12.1	0		49.1333	0
9.13333	0		49.5	0
13.2	0		50.1667	0
33.7667	0		50.7333	0
43.6	0		50.9333	0
25.1333	0		51.1333	0
1.13333	0		51.5667	0
10.1	0		51.9667	0
34.2	0		52.4	0
18.2667	1		52.9	0
21	0		53.2	0
19.9333	0		53.5	0
69.7	0		53.7	0
0.333333	0		53.7	0
14.9333	0		53.7667	0
0.333333	0		53.8	1
23.5667	0		53.8667	0
115.6	0		54.3667	0
16.5333	0		54.6667	1
0.533333	0		54.9333	0
18.4667	0		57.6	0
20.4	0		59.7333	0
10	0		60.6667	0
2.6	0		62.2	0
52.1	1		62.5333	0
10.0667	1		62.9	0
56.6333	1		63	0
5.26667	1		64.3333	0
20.3667	0		64.5	0
43.6	0		65.4667	0
12.1667	0		65.7333	0
82.7667	1		67.0333	1
87.8667	0		68.8	0
1	0		69.4	0
45.5	1		73.7667	0
20.6	0		74.2	0
30.4	0		74.5333	0
40.1	0		74.6667	0
51.4	0		75.4333	0
12.1667	0		75.8	0
41.5667	0		75.8333	0
11.2333	0		77.0667	0
17.7	0		77.2667	0
6.43333	0		77.6333	0
104.2	1		77.8333	0
40.9667	0		79.5667	0
72.8	0		79.6	0
17.3	0		80.8667	0
20.6667	0		81.4	0
51.8667	1		85.3667	1
5.73333	0		86.5333	0
108.733	1		87.1667	0
23.4333	0		88.4333	0
50.2667	1		90.6	0
25.5667	0		90.7	0
33.6333	0		93.7667	0
164.3	0		98.2333	0
0.4	0		99.2	0
0.333333	0		102.933	0
10.6667	0		103.133	0
45.7	0		103.367	0
92.1	1		109.2	0
83.7667	0		112.467	0
27.9667	0		131.367	0
14.5	0		133.033	0
16.8	0		141.1	0
20.2667	0		142.433	0
8.1	0		159.6	0
6.6	0		175.367	0
14.4333	0		0.333333		0
115.4	1		1.13333		0
24.5	0		2.26667		0
17.5333	0		2.33333		0
42.4	1		2.5		1
19.7	0		5.16667		1
14.2667	0		5.26667		0
23.0667	0		5.73333		0
27.4	0		5.8		1
76.3	0		6.5		1
0.366667	0		7.46667		0
11.4333	0		8.1		0
84.9333	0		8.9		1
102.1	1		9.1		0
24.9	0		9.16667		0
18.7333	0		9.66667		0
32.4667	0		10		0
31.0333	0		10.0667		0
12.5	0		10.1		0
51.6	0		10.1333		0
12.2	0		10.6667		0
52.3	0		11.0667		0
0.166667	0		11.2333		0
31.4333	0		11.4333		0
49.7333	0		11.5		0
25.3667	0		12.0667		0
0.333333	0		12.1		0
18.9667	0		12.1667		0
38.0333	0		12.2		1
108.267	0		12.2		1
17.3667	0		12.2		1
191.3	0		12.3667		0
30.2333	0		12.4333		0
12.2	0		12.5		0
9.1	0		12.7667		0
19.0333	1		12.8333		0
10.1333	0		12.8333		0
22.2	0		12.8333		0
108.233	0		13.0667		0
38.8333	0		13.2		0
112.867	0		13.2		0
2.53333	0		13.4333		0
14.3667	0		13.5		0
30.7	1		13.6667		0
13.0667	0		13.9		0
26.3	0		14.2667		0
13.4333	0		14.3333		0
25.7667	0		14.3667		0
10.1333	0		14.4333		0
55.4	0		14.7		0
19.4667	0		14.8667		0
73.0667	1		14.9333		0
27.6333	0		15		0
13.2	0		15.2		0
131.9	0		15.3667		0
80.7333	1		15.4333		0
22.5	0		15.5333		0
54.7	0		15.8333		0
191.633	0		16.0667		0
36.1667	0		16.3		1
4.86667	0		16.5333		0
24.2667	0		16.6333		0
42.2	0		16.8		0
24.9667	1		17.2667		0
15.4333	0		17.3		0
37.3667	0		17.3333		0
28.8333	0		17.3667		0
25.2	0		17.5333		0
48.5333	0		17.6667		0
25.9	0		17.7		0
40.9667	0		17.7333		0
15.5333	0		17.7667		0
26.2	1		18.0333		0
64.9333	0		18.1333		1
10.9333	0		18.4667		0
18.4667	0		18.4667		0
41.5333	0		18.4667		0
26.8667	0		18.5333		1
13.0667	0		18.6333		1
34.7667	0		18.7333		0
12.4333	0		18.9667		0
18.8333	0		19.1333		0
103.367	0		19.1667		0
0.766667	0		19.1667		0
32.4	0		19.2333		0
50.7333	0		19.4667		0
21.9667	0		19.6		0
47.2333	0		19.6667		0
4.46667	0		19.7		0
12.5	0		19.8333		0
79.5667	0		19.9333		0
37.3333	0		20.2		0
21.9667	0		20.2333		0
20.7333	0		20.2667		0
30.2667	0		20.3667		0
11.9333	0		20.4		0
7.46667	1		20.6		0
40.5333	0		20.6667		0
29.5333	0		21		0
27.8	0		21.3333		0
57.6		0	21.4333		0
1		0	21.7		0
13.2		0	21.9333		0
16.2667		0	22.1333		0
17.2667		0	22.2		0
37.9667		0	22.5		0
23.1333		0	22.9667		0
28.9		0	23.0667		0
131.367		0	23.4333		0
83.3		0	23.5667		0
75.8		0	23.8667		1
22.6667		0	24.2		0
81.4		0	24.2333		0
23.9333		0	24.2667		0
32.2667		0	24.5		0
24.1		1	24.9333		0
45.4333		0	25.1333		0
19.2333		0	25.4		1
5.66667		0	25.5667		0
40.1667		0	25.7667		0
18.0333		0	25.9		0
18.4667		0	26.2		0
40.5667		0	26.3		0
75.4333		0	26.3667		1
12.8333		0	27.4		0
13.6667		0	27.9667		0
12.1667		0	28.8333		0
13.2		0	29		0
14.2		0	29.1667		0
49.0333		0	29.1667		0
46.2		0	29.3667		0
80.8667		0	30.2		0
0.333333		0	30.2333		0
74.5333		0	30.3667		0
142.433		1	30.4		0
36.6333		0	31.0333		0
4.13333		0	31.4		0
33.4667		0	31.4333		0
60.6667		0	32.3667		1
1		0	32.5		0
8.4		0	33.2333		0
0.333333		0	33.4667		0
48.9		0	33.4667		0
79.6		0	33.4667		0
4.16667		0	33.5333		0
17.4333		0	33.6333		0
112.467		0	33.7667		0
0.333333		0	34.2		0
1.03333		0	34.2333		0
23.6667		0	34.7667		0
35.7333		1	34.9		0
18.2		0	35.0333		0
38.7667		0	35.5333		0
62.2		0	35.8		0
73.7667		0	36.1667		0
86.5333		0	36.4667		1
1.06667		0	37.8667		1
88.4333		0	38		0
11.8333		0	38.3333		0
27.5		0	38.5333		0
9.8		0	38.5667		0
54.1		0	38.8333		0
93.2667		1	38.8333		0
17.4667		1	40.1		0
16.7		0	40.6667		0
13.8		0	40.9667		0
14.4667		0	41.0333		0
15.9		0	41.5333		0
10.5667		0	41.6		0
32.8		0	42.4		0
23.3667		0	42.9333		0
29.2667		0	43.4333		1
5.33333		1	43.6667		0
16.7667		0	43.7667		1
20.3667		0	44.7667		1
34.7333		0	45.3		0
22.0333		0	45.7		0
23.1333		0	45.7		0
18.4		0	48.5333		0
53.7667		0	51.4		0
50.1667		0	51.6		0
37.9333		0	52.3		0
6.53333		0	53.6333		1
31.9667		1	54.7333		0
16		0	54.8333		1
106.267		0	55.4		0
0.533333		0	55.7667		0
8.6		0	56.1		0
25.0667		0	60.2333		0
103.133		0	64.0667		1
19.3		0	64.9333		0
141.1		0	66.2667		0
21.4333		0	68.0333		1
47.8		0	69.7		0
44.9		0	72.1667		1
16.9667		0	72.8		0
11.9333		0	73		0
237.533		0	76.3		0
13.3		0	76.6		0
7.26667		0	80.1		0
31.4333		0	80.7333		0
19.1667		0	82.3		0
14.3667		0	84.9333		0
33.5667		0	85.2333		1
9.56667		0	87.8667		0
25.3		0	89.8333		0
17.6667		0	90.5667		1
13.6333		0	92.9		1
23.8333		0	99.6333		0
15.2333		0	100.3		0
3		0	102.933		0
3.26667		0	104.033		0
32.2333		1	108.233		0
99.2		0	108.267		0
0.633333		0	112.867		0
175.367		0	115.6		0
97.4333		0	127.867		0
10.2333		0	128.733		1
21.3		0	131.5		0
50.9333		0	131.9		0
34.4667		0	142.833		0
81.4		0	151.667		0
17.5		0	159.2		0
42.5667		0	164.3		0
18.7667		1	179.433		0
19.1667		0
74.6667		0
19.8333		0
9.63333		0
0.8		0
49.5333		0
43.5		0
39.8667		0
51.1333		0
40.1		0
115.367		1
37.3		0
7.96667		1
54.3667		0
33		0
49.3667		0
0.633333		0
1.9		0
24.8333		0
64.9333		0
59.7667		1
64.5		0
48.0667		0
31.6		0
24.1333		0
16.5		0
12.3667		0
44.6667		0
0.233333		0
11.2		1
37.0667		0
52.9		0
15.8667		0
12.1667		0
2.4		0
54.4333		0
17.4		0
18.9667		0
53.7		0
79.5		0
23.4		0
39.6333		0
26.6		0
3.93333		0
18.4		0
35.0333		0
41.4		0
77.6333		0
91.8333		0
27.5667		0
21		0
19.2333		0
46.2667		1
14.1667		0
23.8		0
75.8333		0
50.6333		0
65.7333		0
0.333333		0
0.966667		0
74.8667		0
20.8667		0
15.6667		0
21.3333		0
13.2		0
14.2		0
62.5333		0
53.2		0
13.1		0
14.6333		0
30.7667		0
28.9		0
26.0667		0
53.5		0
102.933		0
64.3333		0
17.6		0
59.7333		0
159.6		0
24.8667		0
77.8333		0
38.3		0
20.8		0
17.9333		1
36		0
18.4		0
44.0333		0
0.333333		0
25.3333		0
19.6667		0
100.567		0
13.4333		0
24.7667		0
32.1667		0
5.73333		1
13.8667		0
90.6		0
69.4		0
22.7667		0
95.5333		1
40.2667		0
13.2667		0
12.1667		0
42.9333		0
28.8333		0
54.9333		0
25.6333		0
5.93333		0
2.8		0
21.1667		0
12.8333		1
49.0333		0
14.5667		0
15.9		0
20.9		0
5.4		0
32.9667		0
63		0
33.1		1
56.4		1
90.7		0
51.5667		0
14.1		0
27.3		0
22		0
21.6667		0
16.6333		0
44.6333		0
24.0667		0
37.7333		0
22.4333		0
98.2333		0
24.6		0
47.6		0
12.7		0
24.2333		0
25.5		0
17.9333		0
53.7		0
21.0333		0
48.7667		0
133.033		0
8.93333		0
58.1		0
73.5667		1
21.7667		1
56.4667		1
36.1667		0
38.2667		0
19.4667		0
52.4		0
93.7667		0
47.9		0
10.7333		0
31.8		0
73.0667		1
84		1
33.3333		0
53.8667		0
13.6667		0
23.7667		0
65.4667		0
7.33333		0
37.5667		0
0.333333		0
27.9		0
40.3333		0
49.1333		0
46.8333		0
57.7667		0
13.1667		0
21.8333		0
26.4		1
122.3		1
51.9667		0
87.1667		0
113.933		1
13.2333		0
34.2		0
34.7667		0
68.8		0
39		0
62.9		0
15.7333		0
44.3333		0
30.5		0
18.4667		0
30.1667		0
44.1667		0
14.6333		0
53.7667		0
6.36667		0
15.7667		0
20.5333		0
85.3667		0
74.2		0
95.1333		1
32.1667		0
21.2667		0
19.6		0
16.7		0
77.0667		0
77.2667		0
75.7667		1
14.9		0
48.8		0
66.4667		0
31.4333		0
36.2667		0
49.5		0
8.63333		0
42.8667		1
109.2		0
8.06667		0
14.9333		0
37.4333		1
104		0
12.8333		0
34.1667		0
