# Supplementary material for: Immunoglobulin superfamily member 10 is a novel prognostic biomarker for breast cancer
Source: PeerJ. 2020 Oct 21;8:e10128. doi: 10.7717/peerj.10128 (PMC7585383; doi:10.7717/peerj.10128)
Supplement: Supplemental Information 6 [file peerj-08-10128-s006.xlsx]

## Sheet: gsea_report_for_high_1571386639
NAME(GSE1456)	GS<br> follow link to MSigDB	GS DETAILS	SIZE	ES	NES	NOM p-val	FDR q-val	FWER p-val	RANK AT MAX	LEADING EDGE
HALLMARK_MTORC1_SIGNALING	HALLMARK_MTORC1_SIGNALING	Details ...	178	0.644848	2.31289	0	0	0	2305	tags=54%, list=17%, signal=65%
HALLMARK_UNFOLDED_PROTEIN_RESPONSE	HALLMARK_UNFOLDED_PROTEIN_RESPONSE	Details ...	99	0.542934	2.26135	0	0	0	3843	tags=57%, list=29%, signal=79%
HALLMARK_OXIDATIVE_PHOSPHORYLATION	HALLMARK_OXIDATIVE_PHOSPHORYLATION	Details ...	171	0.582205	2.19138	0	0.000848153	0.002	3918	tags=71%, list=29%, signal=99%
HALLMARK_DNA_REPAIR	HALLMARK_DNA_REPAIR	Details ...	127	0.52212	2.04311	0	0.00105781	0.004	2403	tags=41%, list=18%, signal=49%
HALLMARK_PROTEIN_SECRETION	HALLMARK_PROTEIN_SECRETION	Details ...	87	0.477403	1.98181	0.00212766	0.00168884	0.007	4145	tags=53%, list=31%, signal=76%
HALLMARK_G2M_CHECKPOINT	HALLMARK_G2M_CHECKPOINT	Details ...	169	0.644541	1.8078	0.0101626	0.0175281	0.084	2288	tags=50%, list=17%, signal=59%
HALLMARK_E2F_TARGETS	HALLMARK_E2F_TARGETS	Details ...	163	0.715103	1.80307	0.00208768	0.0168076	0.087	1744	tags=55%, list=13%, signal=62%
HALLMARK_PI3K_AKT_MTOR_SIGNALING	HALLMARK_PI3K_AKT_MTOR_SIGNALING	Details ...	95	0.372898	1.68638	0.0143149	0.0408705	0.194	3283	tags=38%, list=25%, signal=50%
HALLMARK_GLYCOLYSIS	HALLMARK_GLYCOLYSIS	Details ...	172	0.43044	1.65047	0.0140845	0.0450766	0.245	2281	tags=36%, list=17%, signal=43%
NAME(TCGA)	GS<br> follow link to MSigDB	GS DETAILS	SIZE	ES	NES	NOM p-val	FDR q-val	FWER p-val	RANK AT MAX	LEADING EDGE
HALLMARK_OXIDATIVE_PHOSPHORYLATION	HALLMARK_OXIDATIVE_PHOSPHORYLATION	Details ...	184	0.736784	2.48366	0	0	0	2712	tags=62%, list=14%, signal=71%
HALLMARK_DNA_REPAIR	HALLMARK_DNA_REPAIR	Details ...	148	0.597562	2.25373	0	0.000777916	0.002	3382	tags=53%, list=17%, signal=63%
HALLMARK_GLYCOLYSIS	HALLMARK_GLYCOLYSIS	Details ...	198	0.440614	1.85222	0.00400802	0.0280466	0.105	3951	tags=40%, list=20%, signal=49%
HALLMARK_MTORC1_SIGNALING	HALLMARK_MTORC1_SIGNALING	Details ...	195	0.504747	1.81197	0.01222	0.0325784	0.138	3749	tags=49%, list=19%, signal=60%
HALLMARK_UNFOLDED_PROTEIN_RESPONSE	HALLMARK_UNFOLDED_PROTEIN_RESPONSE	Details ...	107	0.461447	1.77264	0.00195695	0.0386499	0.183	4240	tags=45%, list=21%, signal=57%
HALLMARK_E2F_TARGETS	HALLMARK_E2F_TARGETS	Details ...	195	0.614901	1.77131	0.0453649	0.0340249	0.185	4369	tags=58%, list=22%, signal=74%
HALLMARK_REACTIVE_OXYGEN_SPECIES_PATHWAY	HALLMARK_REACTIVE_OXYGEN_SPECIES_PATHWAY	Details ...	47	0.505456	1.72702	0.00814664	0.0381834	0.219	1119	tags=32%, list=6%, signal=34%
HALLMARK_PI3K_AKT_MTOR_SIGNALING	HALLMARK_PI3K_AKT_MTOR_SIGNALING	Details ...	103	0.450313	1.64678	0.037051	0.143569	0.284	2164	tags=21%, list=11%, signal=24%
HALLMARK_FATTY_ACID_METABOLISM	HALLMARK_FATTY_ACID_METABOLISM	Details ...	155	0.3696	1.51789	0.0386965	0.121774	0.56	3870	tags=39%, list=20%, signal=48%
HALLMARK_G2M_CHECKPOINT	HALLMARK_G2M_CHECKPOINT	Details ...	189	0.426217	1.50918	0.0254438	0.2351	0.896	4525	tags=53%, list=23%, signal=68%
HALLMARK_TGF_BETA_SIGNALING	HALLMARK_KRAS_SIGNALING_UP	Details ...	196	-0.575982	-2.25709	0	0.0004375	0.001	3857	tags=44%, list=20%, signal=55%
HALLMARK_EPITHELIAL_MESENCHYMAL_TRANSITION	HALLMARK_EPITHELIAL_MESENCHYMAL_TRANSITION	Details ...	197	-0.695549	-2.1776	0	0.00106826	0.003	3087	tags=55%, list=16%, signal=64%
HALLMARK_ANGIOGENESIS	HALLMARK_ANGIOGENESIS	Details ...	36	-0.634164	-2.02192	0	0.00860434	0.028	1519	tags=33%, list=8%, signal=36%
HALLMARK_APICAL_JUNCTION	HALLMARK_APICAL_JUNCTION	Details ...	194	-0.481391	-2.00952	0.00191571	0.00774312	0.031	4061	tags=41%, list=21%, signal=51%
HALLMARK_INFLAMMATORY_RESPONSE	HALLMARK_INFLAMMATORY_RESPONSE	Details ...	199	-0.558093	-1.99436	0.0121951	0.00743155	0.033	5747	tags=58%, list=29%, signal=81%
HALLMARK_IL2_STAT5_SIGNALING	HALLMARK_IL2_STAT5_SIGNALING	Details ...	195	-0.479568	-1.98516	0	0.00757696	0.035	4597	tags=44%, list=23%, signal=56%
HALLMARK_TNFA_SIGNALING_VIA_NFKB	HALLMARK_TNFA_SIGNALING_VIA_NFKB	Details ...	198	-0.549204	-1.90366	0.00986193	0.0118154	0.065	4095	tags=44%, list=21%, signal=56%
