# Supplementary material for: Immunoglobulin superfamily member 10 is a novel prognostic biomarker for breast cancer
Source: PeerJ. 2020 Oct 21;8:e10128. doi: 10.7717/peerj.10128 (PMC7585383; doi:10.7717/peerj.10128)
Supplement: Supplemental Information 7 [file peerj-08-10128-s007.xlsx]

## Sheet: Sheet1
Analyses of the mRNA expression of IGSF10 in breast cancer in Oncomine database
Dataset	Normal（cases）	Tumor（cases）	Fold Change	t-Test	p-value
TCGA Breast	Breast(61)	Invasive Lobular Breast Carcinoma（36）	-6.845	-15.083	2.86e-23
	Breast(61)	Invasive Breast Carcinoma (76)	-7.06	-16.943	2.91e-35
	Breast(61)	Invasive Ductal Breast Carcinoma (389)	-10.628	-30.383	1.35e-48
Karnoub Breast	Breast(15)	Invasive Ductal Breast Carcinoma (7)	-3.014	-6.149	3.2e-06
Zhao Breast	Breast(3)	Invasive Ductal Breast Carcinoma (38)	-2.306	-11.59	1.27e-08
Richardson Breast 2	Breast(7)	Ductal Breast Carcinoma (40)	-6.421	-10.177	6.42e-06
Finak Breast	Breast(6)	Invasive Breast Carcinoma (53)	-11.035	-20.892	1.08e-20
